# Supplementary material for: Neat and rapid preparation of hydrophobic magnetic ionic liquids composed of transition metal chelates featuring in situ formation capabilities in aqueous matrices
Source: Royal Society of Chemistry journal article supplement (doi:10.1039/d4nj00624k), 2024-01-01
Supplement: d4nj00624k1.pdf [file d4nj00624k1.pdf]

## Supporting Information

### Neat and Rapid Preparation of Hydrophobic Magnetic Ionic Liquids Composed of Transition Metal Chelates Featuring *In-situ* Formation Capabilities in Aqueous Matrices

Nabeel Mujtaba Abbasi,<sup>1</sup> Pravin S. Shinde,<sup>2</sup> Kathryn E. O’Harra,<sup>2</sup> Anis Biswas,<sup>1</sup> Jason E.  
Bara,<sup>2</sup> and Jared L. Anderson<sup>1,\*</sup>

<sup>1</sup>*Department of Chemistry, Iowa State University, Ames, Iowa 50011, USA and* <sup>2</sup>*Department of  
Chemical & Biological Engineering, University of Alabama, Tuscaloosa, AL 35487-0203 USA*

|                                                                                                                       |               |
|-----------------------------------------------------------------------------------------------------------------------|---------------|
| Chemicals and reagents.....                                                                                           | Page S2       |
| Magnetic susceptibilities and calculations for the effective magnetic moment ( $\mu_{\text{eff}}$ ) using<br>MSB..... | Page S3       |
| Instrument parameters employed to obtain TGA and DSC thermograms.....                                                 | Page S4       |
| Crystal structures of hydrated transition metal-based $[\text{NTf}_2^-]_2$ salts.....                                 | Page S5       |
| Table S1.....                                                                                                         | Page S6       |
| Figure S1.....                                                                                                        | Page S7       |
| Figure S2.....                                                                                                        | Page S8       |
| Figure S3.....                                                                                                        | Page S9       |
| Figure S4.....                                                                                                        | Page S10      |
| Thermograms obtained using TGA for transition metal MILs (Figures S5-S18).....                                        | Pages S11-S24 |
| Thermograms obtained using DSC for MILs comprised of $[\text{NTf}_2^-]$ salts (Figures S19-S32)<br>.....              | Pages S25-S38 |
| NMR spectra.....                                                                                                      | Pages S39-S40 |
| References.....                                                                                                       | Page S41      |

### List of chemicals and reagents

Triethylamine ( $\text{Et}_3\text{N}$ , 99%) was purchased from Acros Organics (Morris Plains, NJ, USA). Hydrochloric acid ( $\text{HCl}$ , certified ACS plus), 1-(3-aminopropyl)imidazole (AmIm, 98%), sodium hydrogen carbonate ( $\text{NaHCO}_3$ , certified ACS powder, 99.7-100.3%), cobalt(II) carbonate ( $\text{CoCO}_3$ , 99% metal basis), *N,N*-dimethylacetamide (*N,N*-DMAc, 99%), and ammonium hydroxide ( $\text{NH}_4\text{OH}$ , certified ACS plus) were purchased from Fisher Scientific (Pittsburgh, PA, USA). Nickel(II) carbonate ( $\text{NiCO}_3$ , 99%) was obtained from Oakwood Chemical. Diglycolyl chloride (> 97%), *N,N*-dimethylpropionamide (*N,N*-DMP, 98%), and bis(trifluoromethanesulfonyl)imide ( $\text{HNTf}_2$ , > 99%) were purchased from Tokyo Chemical Industry (TCI, Portland, OR, USA). 1-Hexylimidazole (Him, 95%) and 1-octyl-1H-imidazole (OIm, 96%) were procured from Ambeed. Diethyl ether ( $\geq 99\%$ ) and dioctylamine (97%) were purchased from MilliporeSigma (St. Louis, MO, USA).

## Magnetic susceptibilities and calculations for the effective magnetic moment ( $\mu_{\text{eff}}$ ) using MSB

To calculate the molar magnetic susceptibility ( $X_M$ ), equation 1 was employed.<sup>1</sup>

$$X_M = [C_{\text{bal}} L M (R - R_0)] / (10^9 m) \quad (1)$$

In equation 1,  $C_{\text{bal}}$  represents the balance calibration constant,  $L$  the length of MIL in the sample tube,  $M$  the molecular weight of the solvent,  $R$  the instrument reading displayed for the MIL in the sample tube,  $R_0$  the initial reading for the empty tube, and  $m$  the mass of the MIL sample. The  $X_M$  value can be used to calculate the  $\mu_{\text{eff}}$  using equation 2.<sup>1</sup>

$$\mu_{\text{eff}} = 2.83 (X_M T)^{0.5} \quad (2)$$

In equation 2,  $T$  represents the temperature at which the magnetic susceptibility measurements were conducted.

### **Instrument parameters used to obtain TGA and DSC thermograms**

To perform TGA measurements, MIL samples (6 – 15 mg) were placed in a high-purity cylindrical alumina pan and heated from 30 to 600 °C at a ramp rate of 10 °C min<sup>-1</sup> under a constant flow of ultra-high purity argon gas (UHP300, Airgas) at a flow rate of 10 mL min<sup>-1</sup>. To conduct DSC measurements, samples were prepared by sealing an appropriate amount of MIL using Alodined Hermetic Tzero Aluminum Pan and Hermetic Tzero Lid with the help of a Tzero press. Samples were heated from -40 to 200 °C at a ramp rate of 10 °C min<sup>-1</sup> and held for 5 min under a steady flow of N<sub>2</sub> gas (20 mL min<sup>-1</sup>) before being cooled at the same rate.

## Crystal structures of hydrated transition metal-based [NTf<sub>2</sub>]<sup>-</sup> salts

In an effort to describe the arrangement of atoms in their crystal lattice, both the [Co(H<sub>2</sub>O)<sub>6</sub>][NTf<sub>2</sub>]<sub>2</sub> and [Ni(H<sub>2</sub>O)<sub>6</sub>][NTf<sub>2</sub>]<sub>2</sub> salts were examined using X-ray diffraction (XRD). All measurements were performed by employing a monochromatic Cu K $\alpha$  radiation ( $\lambda = 1.5405$  Å) in a Bragg-Brentano configuration, covering a  $2\theta$  range from 10 to 50° with a step size of 0.004° and dwell time of 5 s per step. During optimization, quick XRD scans ( $2\theta$ : 5-100°) were performed at step size of 0.02° and dwell time of 1 s per step to narrow down the range for slow scan, as shown in Figure S1. To ensure accuracy, high-purity silicon powder was used as standard reference material.

An overlay of XRD patterns for the hydrated [NTf<sub>2</sub>]<sup>-</sup> salts of Co<sup>2+</sup> and Ni<sup>2+</sup> are provided in Figure S2. XRD patterns of both the salts are almost identical with the notable exception of a few additional peaks around 15, 17.7, and 23° evident for the Co<sup>2+</sup> salt. The lattice spacing ( $d$ )-values calculated from Bragg's law for three major high-intensity peaks of Co<sup>2+</sup> and Ni<sup>2+</sup> salts were found to be 0.5587, 0.4516, and 0.3771 nm ( $2\theta$ : 15.85, 19.64, and 23.57°), and 0.5577, 0.5016, and 0.4484 nm ( $2\theta$ : 15.88, 17.67, and 19.78°), respectively. Although both salts exhibited polycrystalline features, the Ni<sup>2+</sup> version produced high intensity peaks, demonstrating higher scattering power of its crystal lattice. Additionally, some of the peaks in the XRD scan for the Ni<sup>2+</sup> salt generated a slight shift towards higher  $2\theta$  angles by approximately 0.2°, which can be attributed to the lattice stress stemming from slightly different ionic sizes of Co (0.072 nm) and Ni<sup>2+</sup> (0.078 nm) cations.

**Table S1.** Melting point ( $T_m$ ) /glass transition ( $T_g$ ) temperatures of MILs as measured by Discovery DSC-250 instrument.

| MIL                                                                                | $T_g$ (°C)      | $T_m$ (°C)      |
|------------------------------------------------------------------------------------|-----------------|-----------------|
| [Co( <b>HI</b> m) <sub>6</sub> ][NTf <sub>2</sub> ] <sub>2</sub>                   | -               | -               |
| [Ni( <b>HI</b> m) <sub>6</sub> ][NTf <sub>2</sub> ] <sub>2</sub>                   | -               | -               |
| [Co( <b>O</b> I <b>m</b> ) <sub>6</sub> ][NTf <sub>2</sub> ] <sub>2</sub>          | -               | 20.89           |
| [Ni( <b>O</b> I <b>m</b> ) <sub>6</sub> ][NTf <sub>2</sub> ] <sub>2</sub>          | -               | 26.06           |
| [Co( <b>Am</b> I <b>m</b> ) <sub>6</sub> ][NTf <sub>2</sub> ] <sub>2</sub>         | -               | -               |
| [Ni( <b>Am</b> I <b>m</b> ) <sub>6</sub> ][NTf <sub>2</sub> ] <sub>2</sub>         | -               | -               |
| [Co( <b>N,N</b> -D <b>MAc</b> ) <sub>6</sub> ][NTf <sub>2</sub> ] <sub>2</sub>     | -               | -               |
| [Ni( <b>N,N</b> -D <b>MAc</b> ) <sub>6</sub> ][NTf <sub>2</sub> ] <sub>2</sub>     | -               | -               |
| [Co( <b>N,N</b> -D <b>MP</b> ) <sub>6</sub> ][NTf <sub>2</sub> ] <sub>2</sub>      | -               | -               |
| [Ni( <b>N,N</b> -D <b>MP</b> ) <sub>6</sub> ][NTf <sub>2</sub> ] <sub>2</sub>      | -               | -               |
| [Co( <b>TODGA</b> ) <sub>2</sub> ][NTf <sub>2</sub> ] <sub>2</sub>                 | -               | -               |
| [Ni( <b>TODGA</b> ) <sub>2</sub> ][NTf <sub>2</sub> ] <sub>2</sub>                 | -               | -               |
| [ <b>Co</b> (H <sub>2</sub> O) <sub>6</sub> ][NTf <sub>2</sub> ] <sub>2</sub> salt | 31.93,<br>59.93 | 65.78,<br>95.04 |
| [ <b>Ni</b> (H <sub>2</sub> O) <sub>6</sub> ][NTf <sub>2</sub> ] <sub>2</sub> salt | 11.38           | 74.46           |

“-” No  $T_m$ / $T_g$  peak was observed/reported down to -40 °C

## XRD patterns of [NTf<sub>2</sub><sup>-</sup>] salts

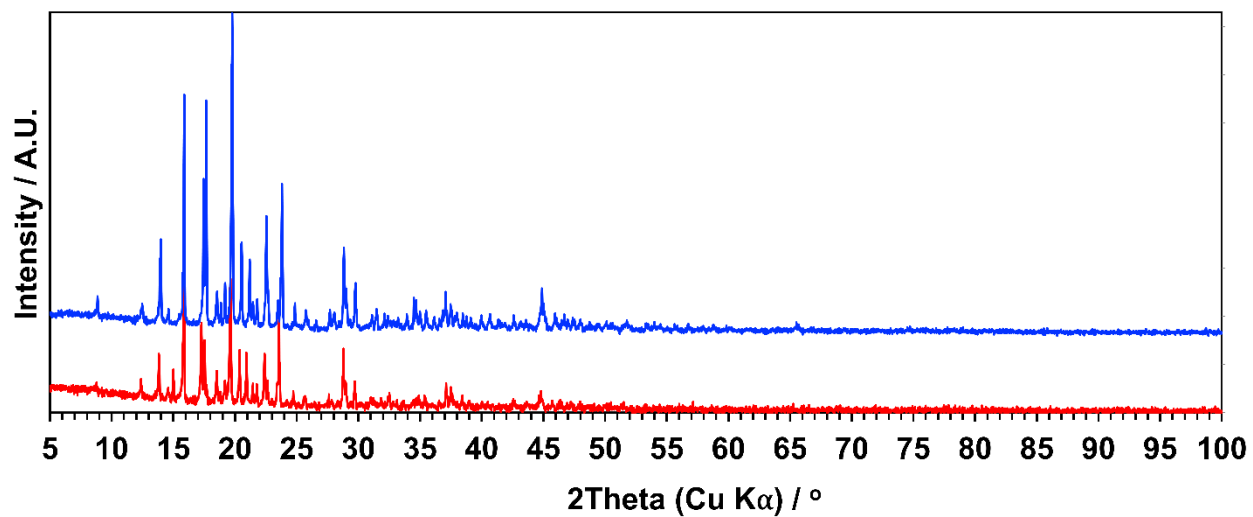

**Figure S1:** Plot of quick XRD scans for the [NTf<sub>2</sub><sup>-</sup>] salts of Co<sup>2+</sup> and Ni<sup>2+</sup>. [Co(H<sub>2</sub>O)<sub>6</sub>][NTf<sub>2</sub>]<sub>2</sub> (—) and [Ni(H<sub>2</sub>O)<sub>6</sub>][NTf<sub>2</sub>]<sub>2</sub> (—). Parameters:  $2\theta$  range from 5 to 100°, step size of 0.02°, and dwell time of 1 s per step.

(A)

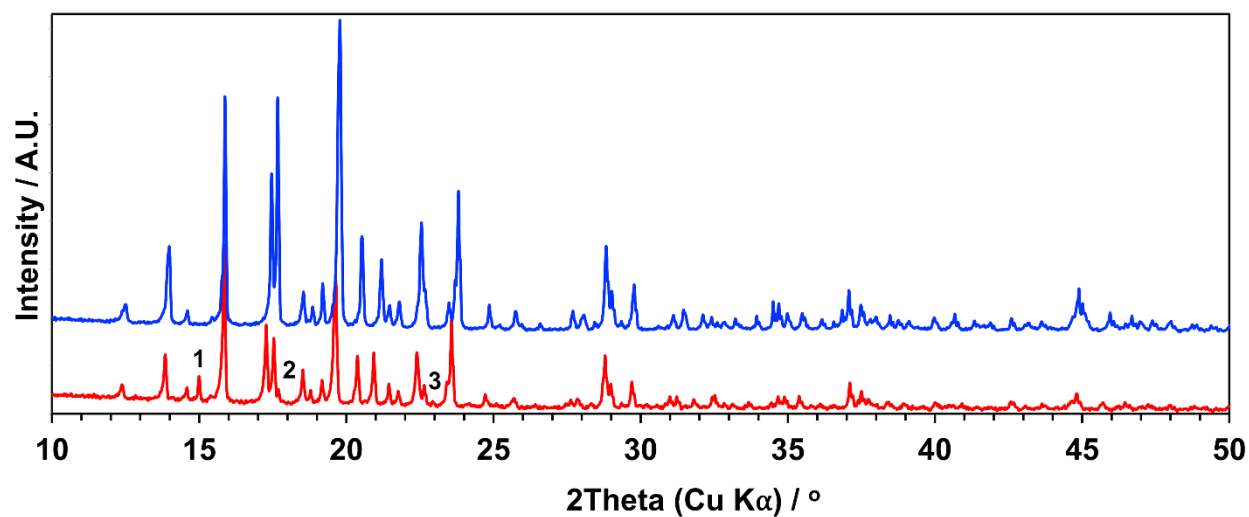

(B)

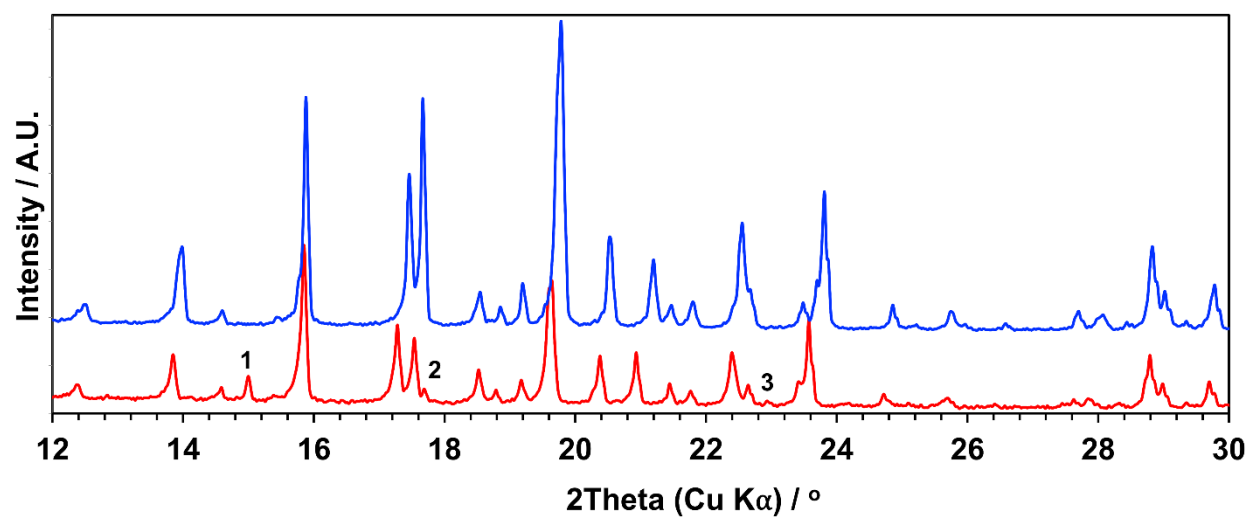

**Figure S2:** XRD patterns obtained for the [NTf<sub>2</sub><sup>-</sup>] salts of Co<sup>2+</sup> and Ni<sup>2+</sup>. [Co(H<sub>2</sub>O)<sub>6</sub>][NTf<sub>2</sub>]<sub>2</sub> (—) and [Ni(H<sub>2</sub>O)<sub>6</sub>][NTf<sub>2</sub>]<sub>2</sub> (—). Parameters: (A) 2θ range from 10 to 50° and (B) 12 to 30°, step size of 0.004°, and dwell time of 5 s per step. Additional peaks observed for the Co<sup>2+</sup> salt: **1**, 15°; **2**, 17.7°; and **3**, 23°.



### Long-term chemical stability of MILs

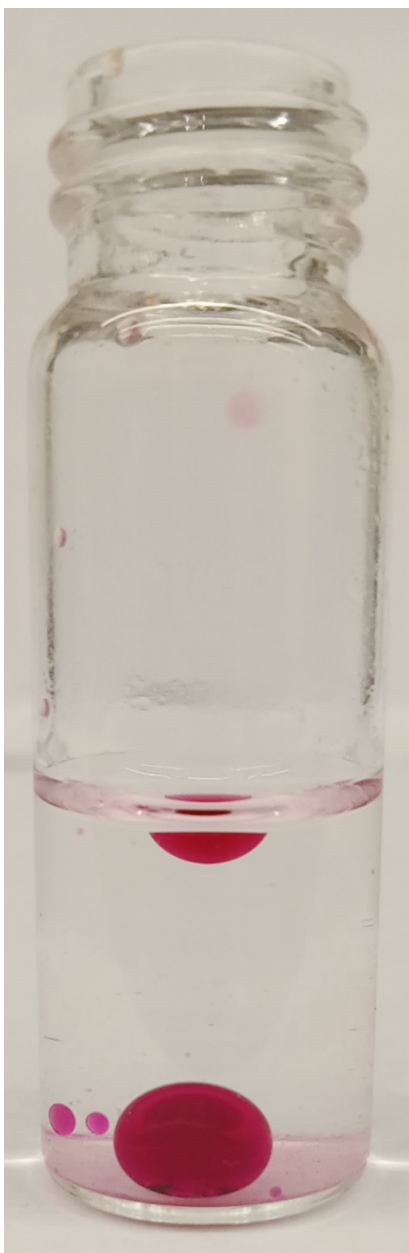

**Figure S3:** Photograph depicting the  $[\text{Co}(\text{HIm})_6][\text{NTf}_2]_2$  MIL sample stored under water for over 6 months.

Magnetization data for transition metal-based MIL measured using SQUID magnetometer

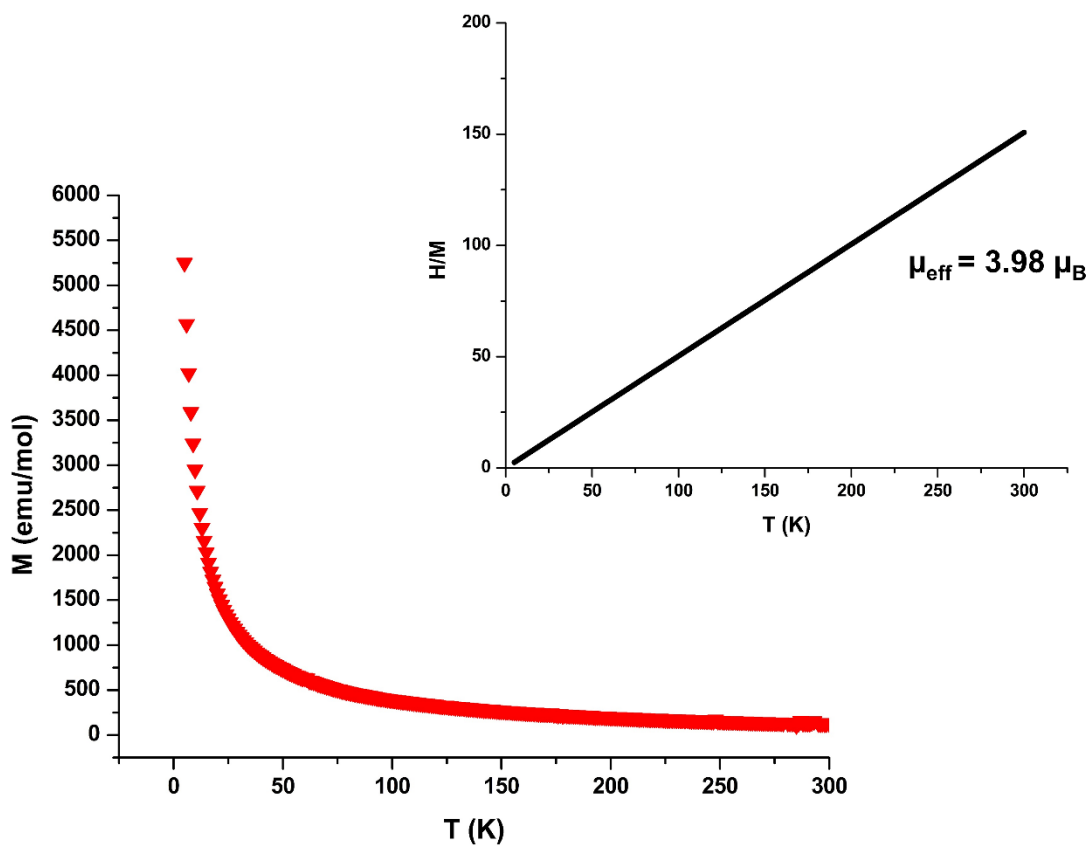

**Figure S4:** Magnetization of the  $[\text{Co}(\text{HIm})_6][\text{NTf}_2]_2$  MIL as a function of temperature in an applied magnetic field of  $H = 20$  kOe. The inset shows the linear portion of the reciprocal susceptibility vs. temperature curve following Curie-Weiss law.

## Thermograms obtained using TGA for transition metal-based MILs

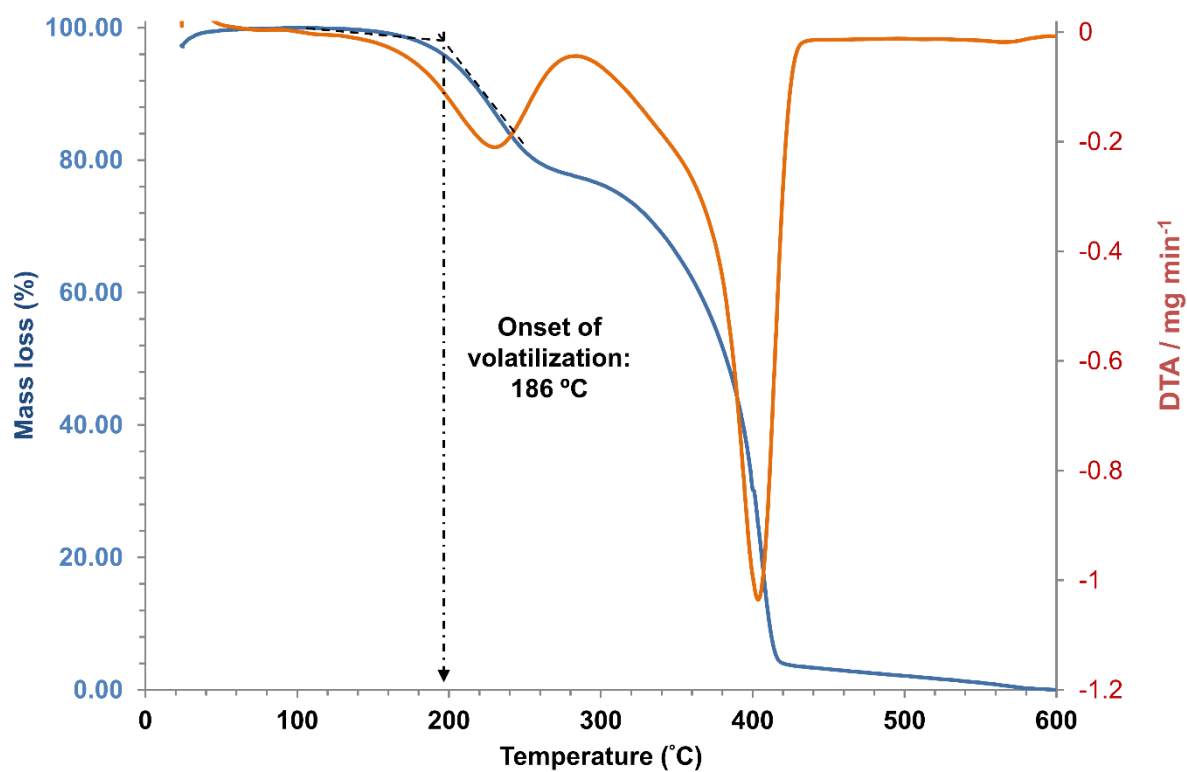

**Figure S5:** Volatilization/degradation of the [Co(HIm)<sub>6</sub>][NTf<sub>2</sub>]<sub>2</sub> MIL as a function of temperature measured using TGA.

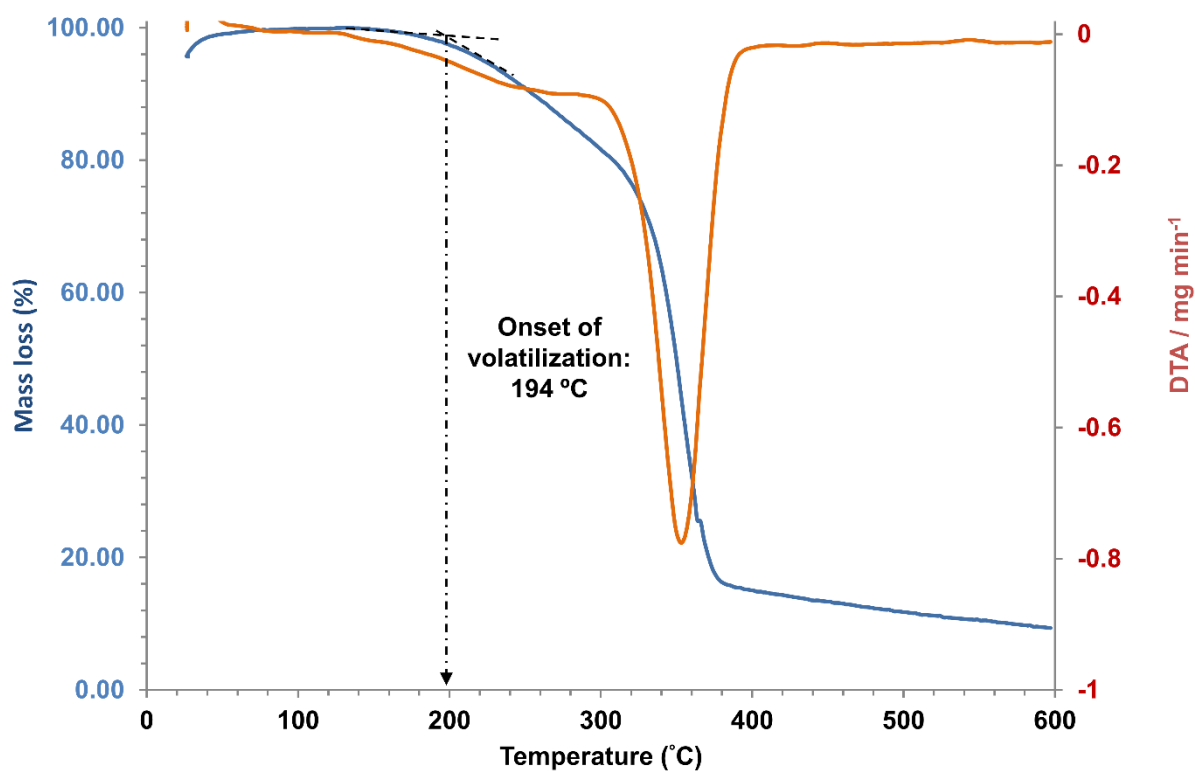

**Figure S6:** Volatilization/degradation of the  $[\text{Ni}(\text{HIm})_6][\text{NTf}_2]_2$  MIL as a function of temperature measured using TGA.

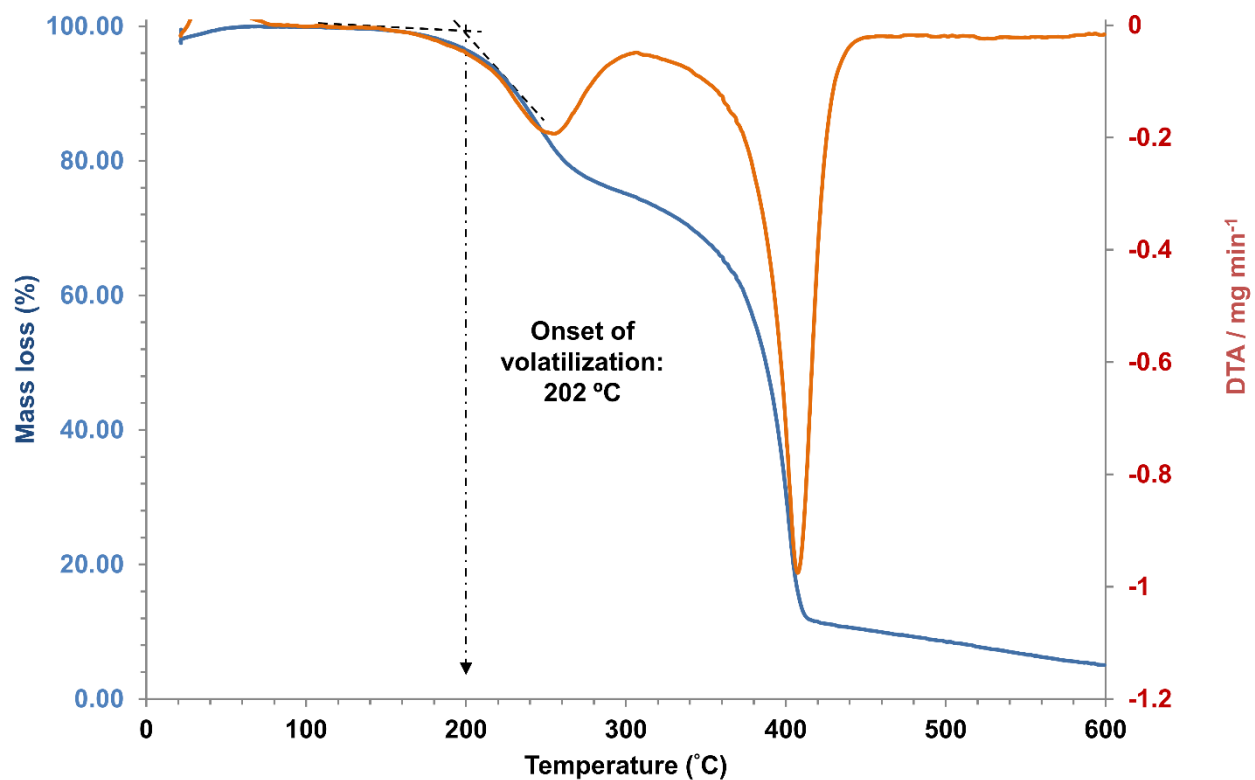

**Figure S7:** Volatilization/degradation of the  $[\text{Co}(\text{OIm})_6][\text{NTf}_2]_2$  MIL as a function of temperature measured using TGA.

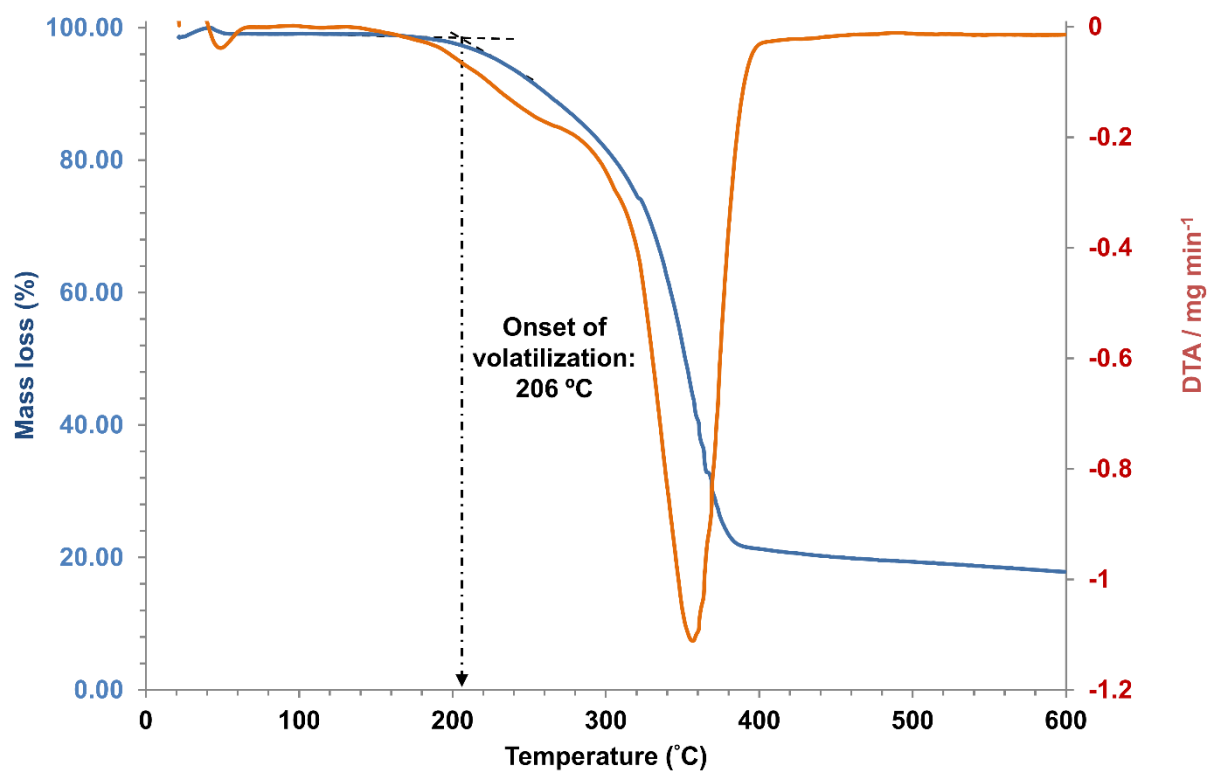

**Figure S8:** Volatilization/degradation of the  $[\text{Ni}(\text{OIm})_6][\text{NTf}_2]_2$  MIL as a function of temperature measured using TGA.

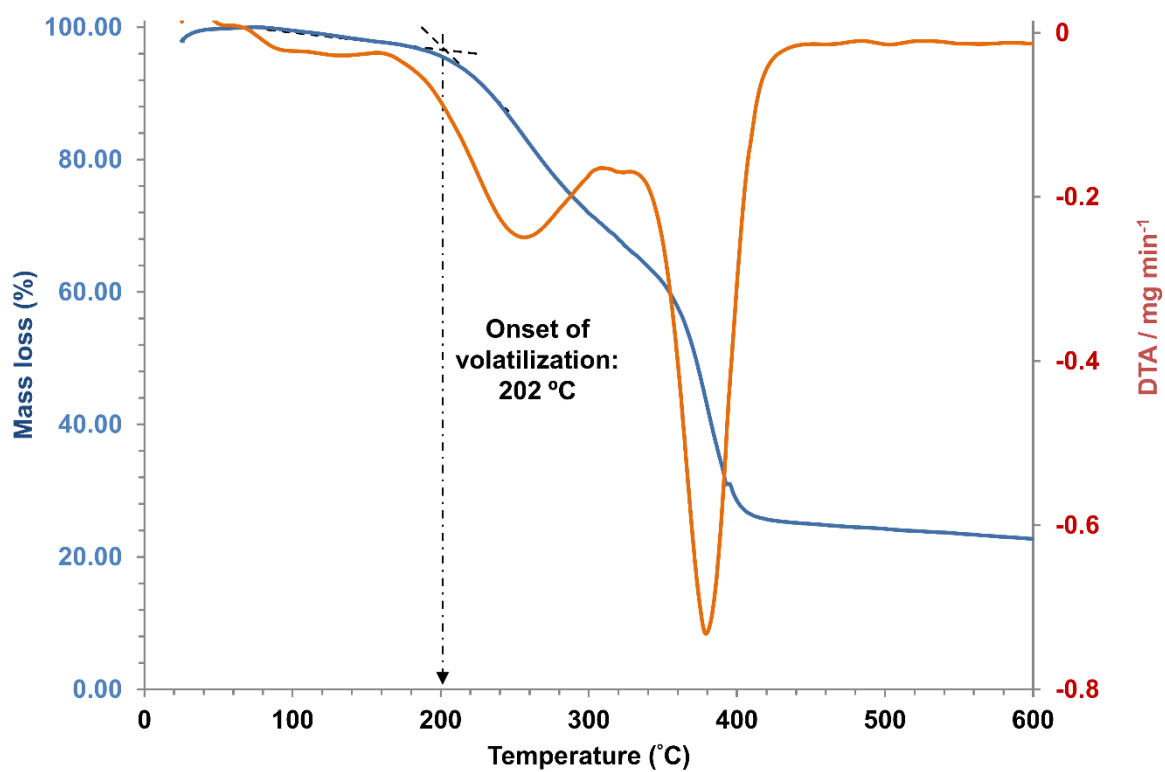

**Figure S9:** Volatilization/degradation of the  $[\text{Co}(\text{AmIm})_6][\text{NTf}_2]_2$  MIL as a function of temperature measured using TGA.

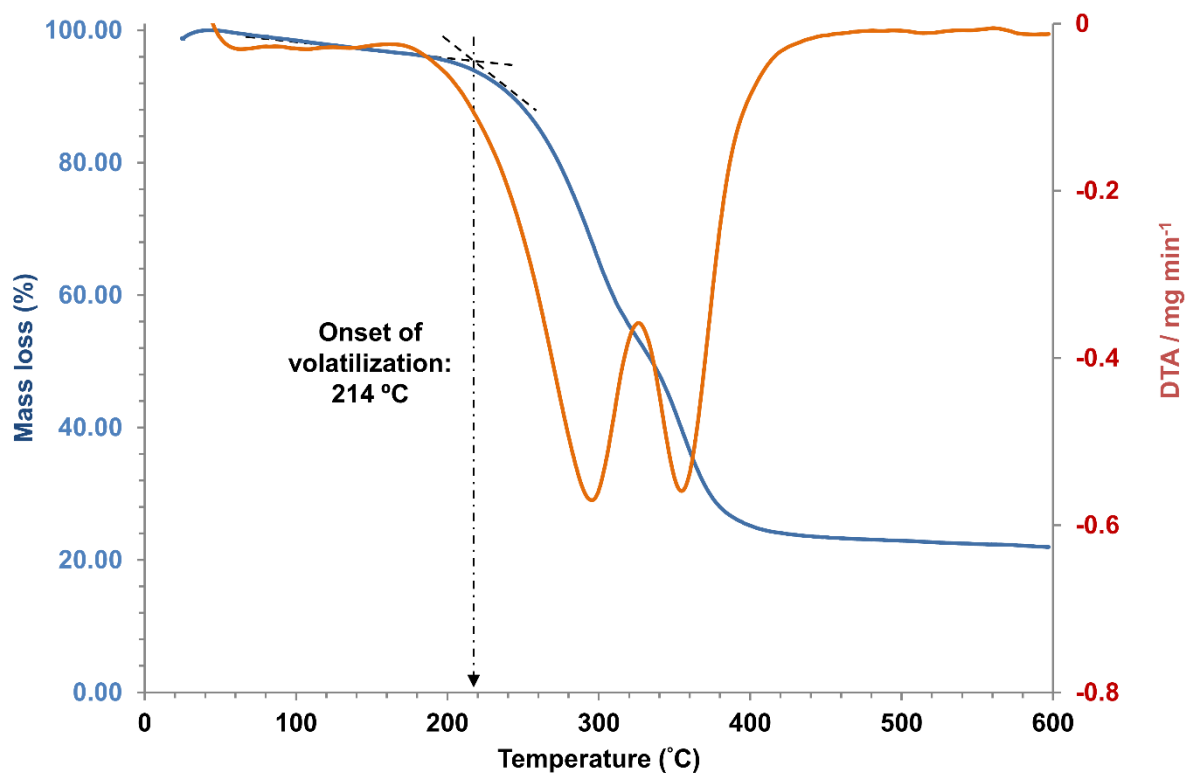

**Figure S10:** Volatilization/degradation of the  $[\text{Ni}(\text{AmIm})_6][\text{NTf}_2]_2$  MIL as a function of temperature measured using TGA.



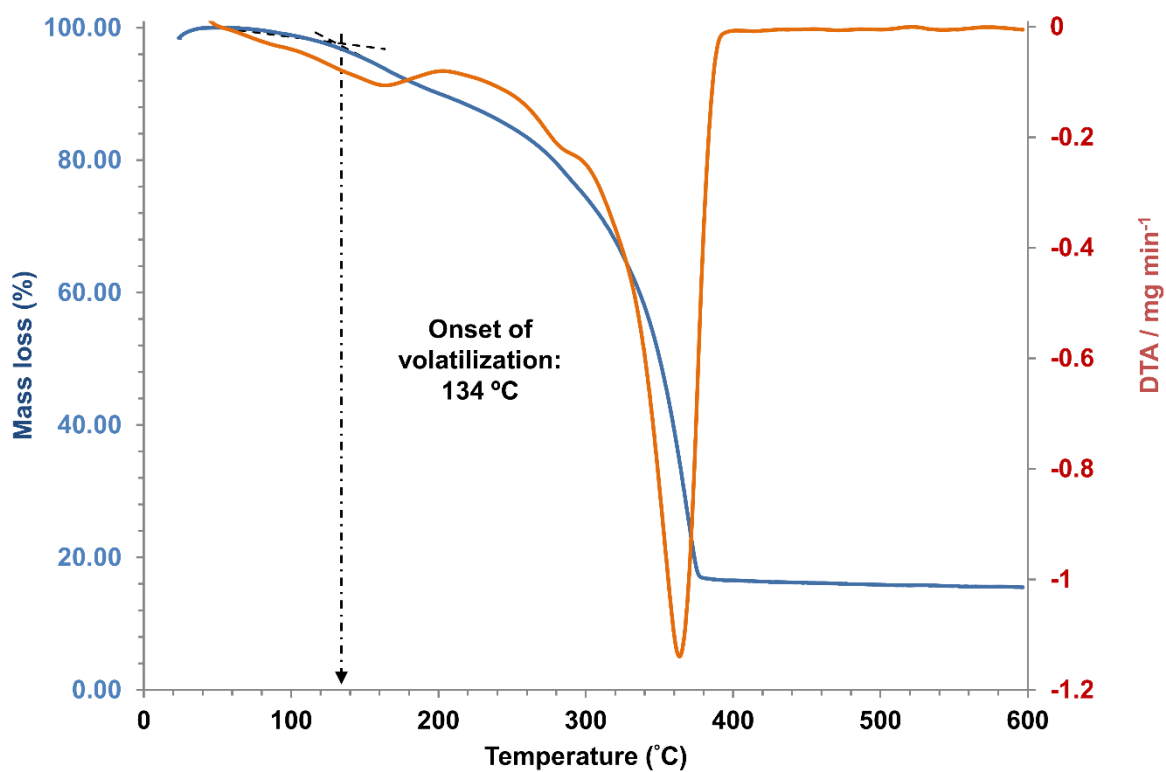

**Figure S11:** Volatilization/degradation of the  $[\text{Co}(\text{N},\text{N}\text{-DMAC})_6][\text{NTf}_2]_2$  MIL as a function of temperature measured using TGA.

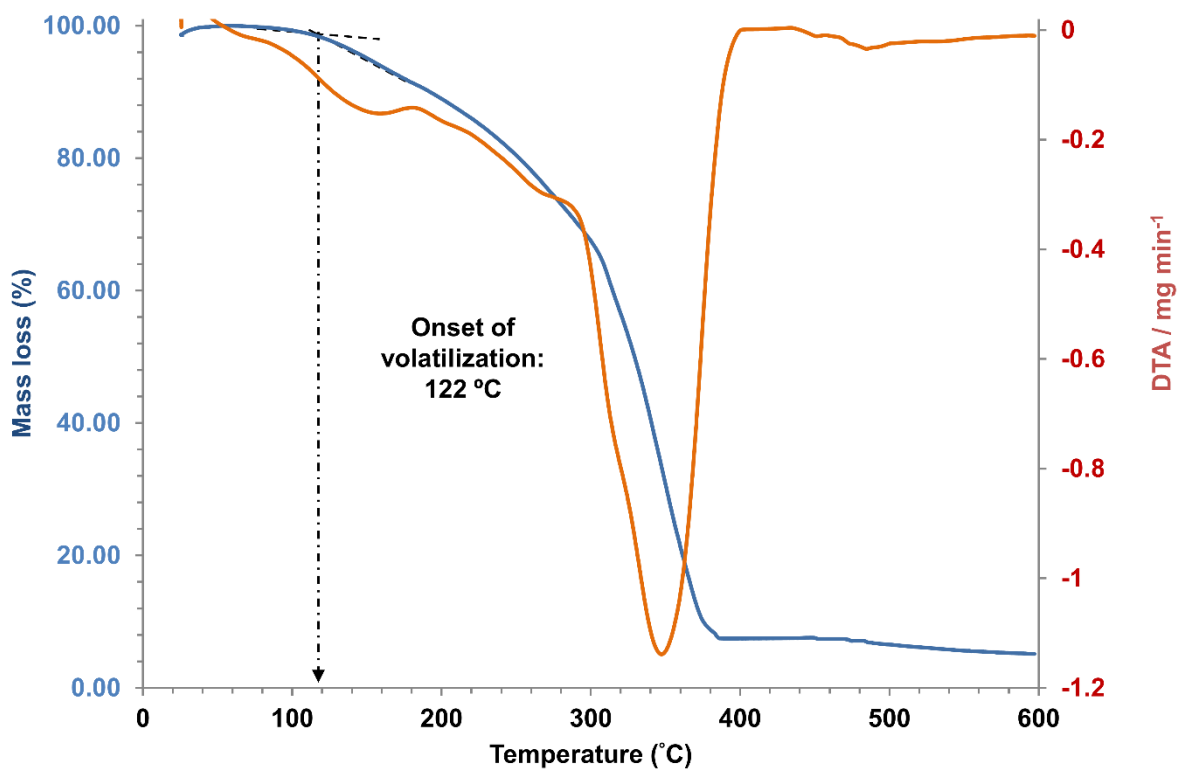

**Figure S12:** Volatilization/degradation of the  $[\text{Ni}(\text{N},\text{N}\text{-DMAC})_6][\text{NTf}_2]_2$  MIL as a function of temperature measured using TGA.

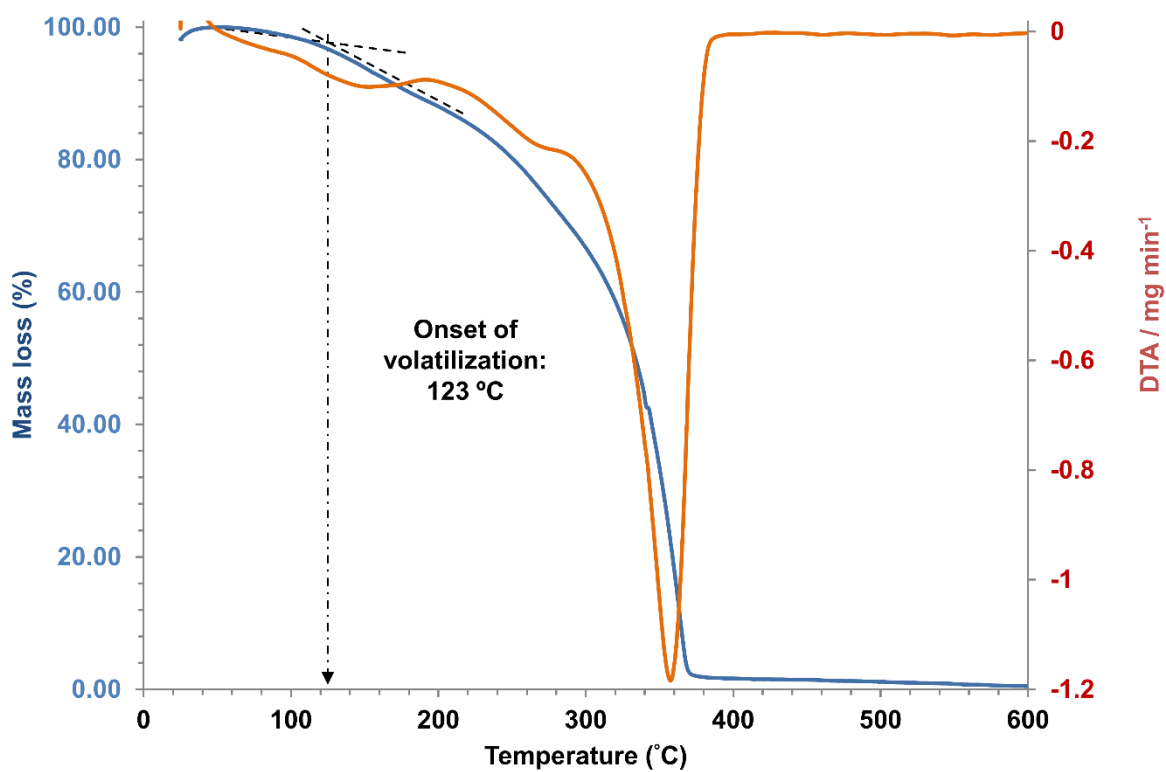

**Figure S13:** Volatilization/degradation of the  $[\text{Co}(\text{N},\text{N}\text{-DMP})_6][\text{NTf}_2]_2$  MIL as a function of temperature measured using TGA.

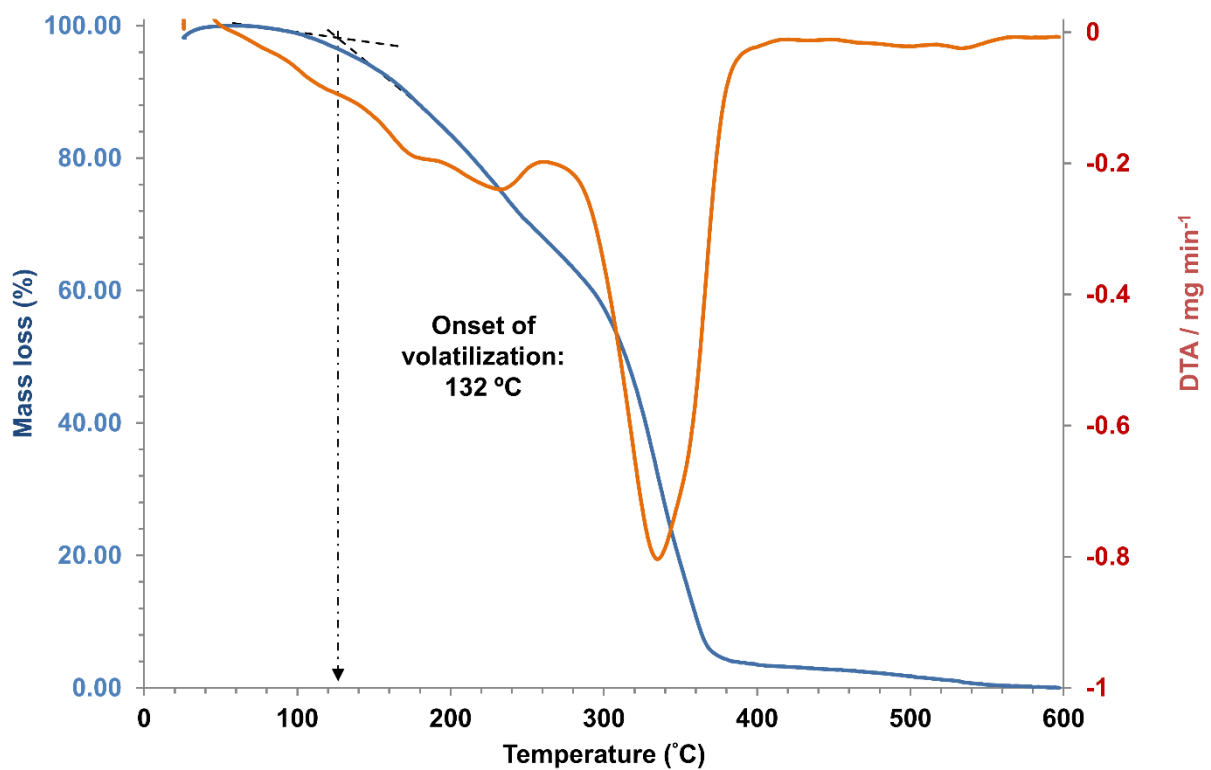

**Figure S14:** Volatilization/degradation of the  $[\text{Ni}(\text{N},\text{N}\text{-DMP})_6][\text{NTf}_2]_2$  MIL as a function of temperature measured using TGA.

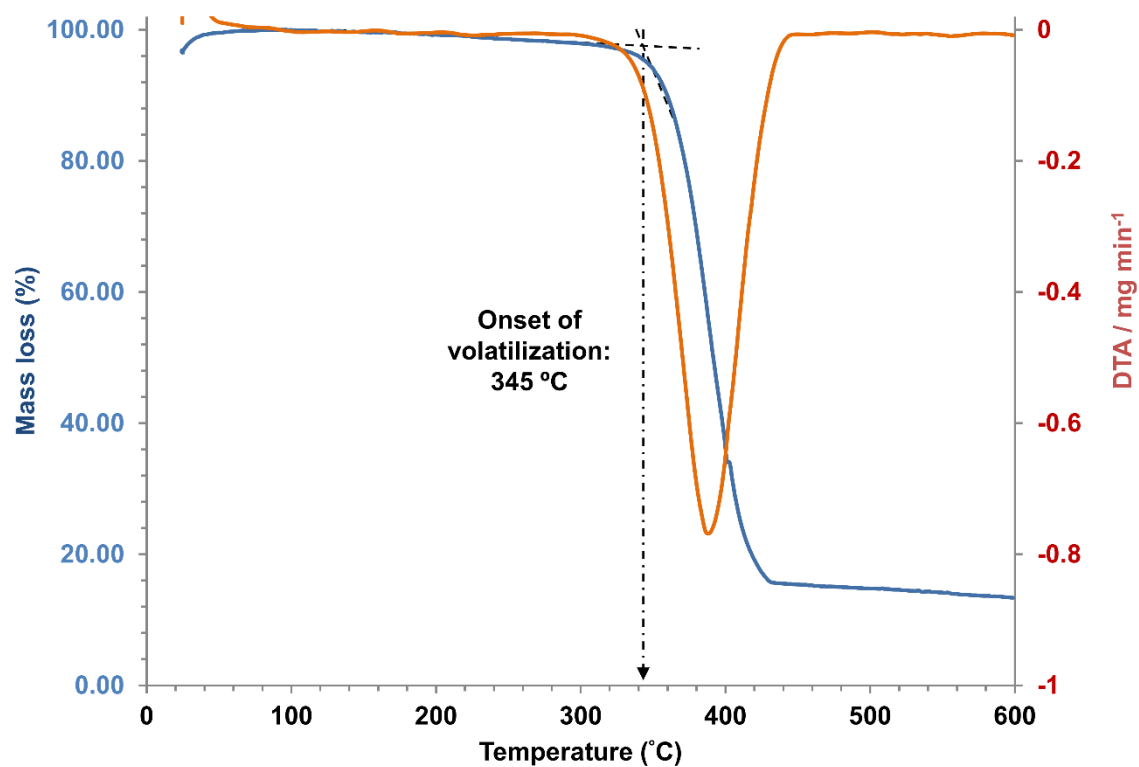

**Figure S15:** Volatilization/degradation of the  $[\text{Co}(\text{TODGA})_2][\text{NTf}_2]_2$  MIL as a function of temperature measured using TGA.

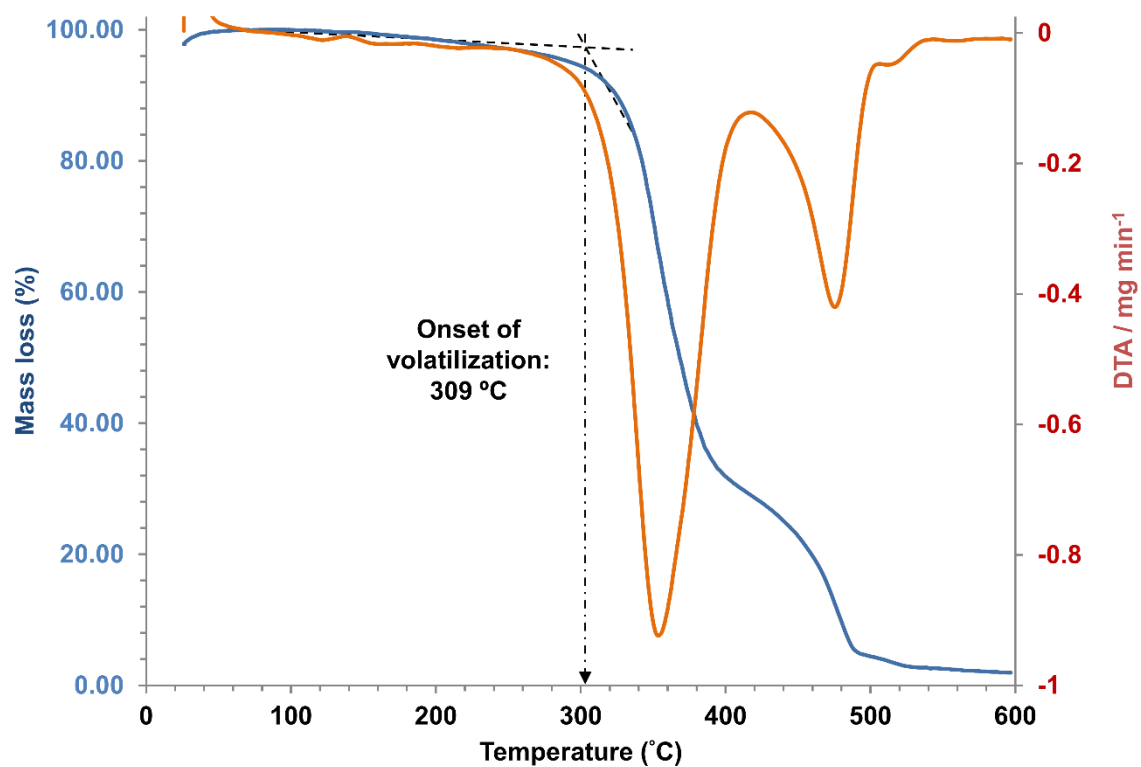

**Figure S16:** Volatilization/degradation of the  $[\text{Ni}(\text{TODGA})_2][\text{NTf}_2]_2$  MIL as a function of temperature measured using TGA.

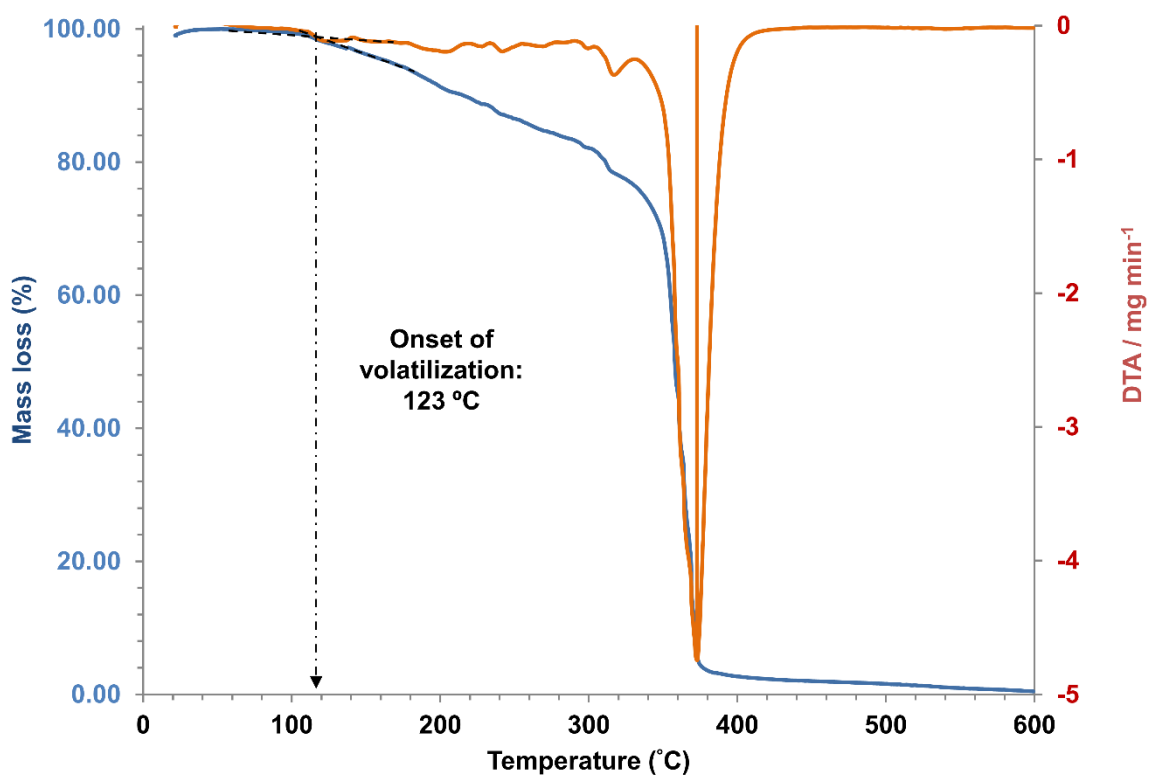

**Figure S17:** Volatilization/degradation of the  $[\text{Co}(\text{H}_2\text{O})_6][\text{NTf}_2]_2$  salt as a function of temperature measured using TGA.

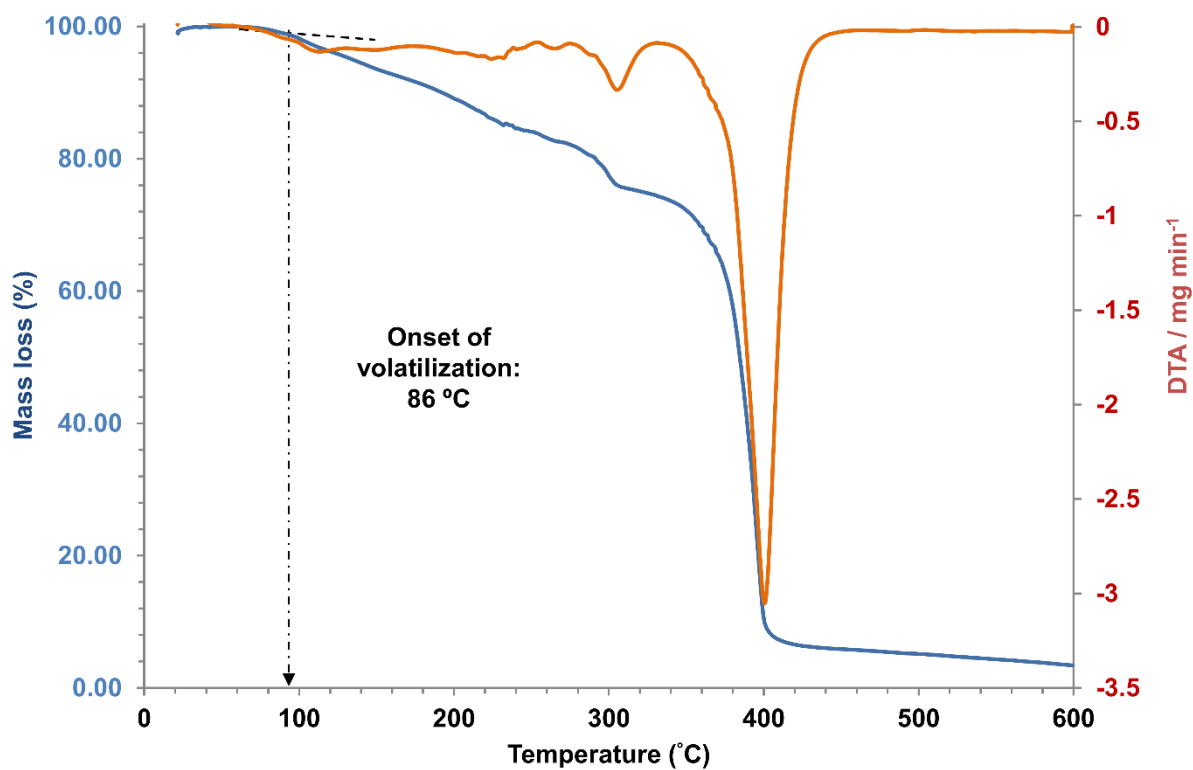

**Figure S18:** Volatilization/degradation of the  $[\text{Ni}(\text{H}_2\text{O})_6][\text{NTf}_2]_2$  salt as a function of temperature measured using TGA.



### Thermograms obtained using DSC for MILs comprised of $[\text{NTf}_2^-]$ salts

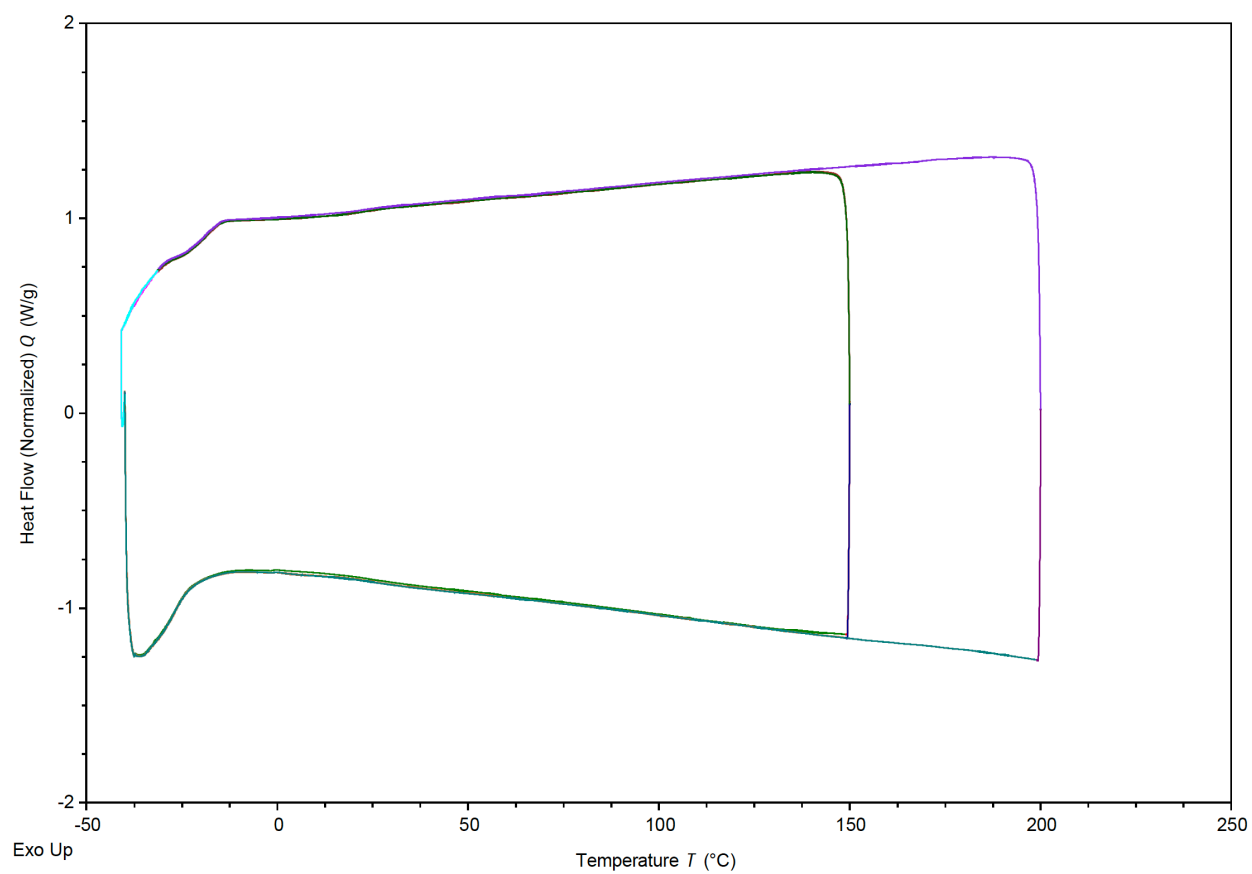

**Figure S19:** Thermal properties of the  $[\text{Co}(\text{HIm})_6][\text{NTf}_2]_2$  MIL measured as a function of temperature using DSC.

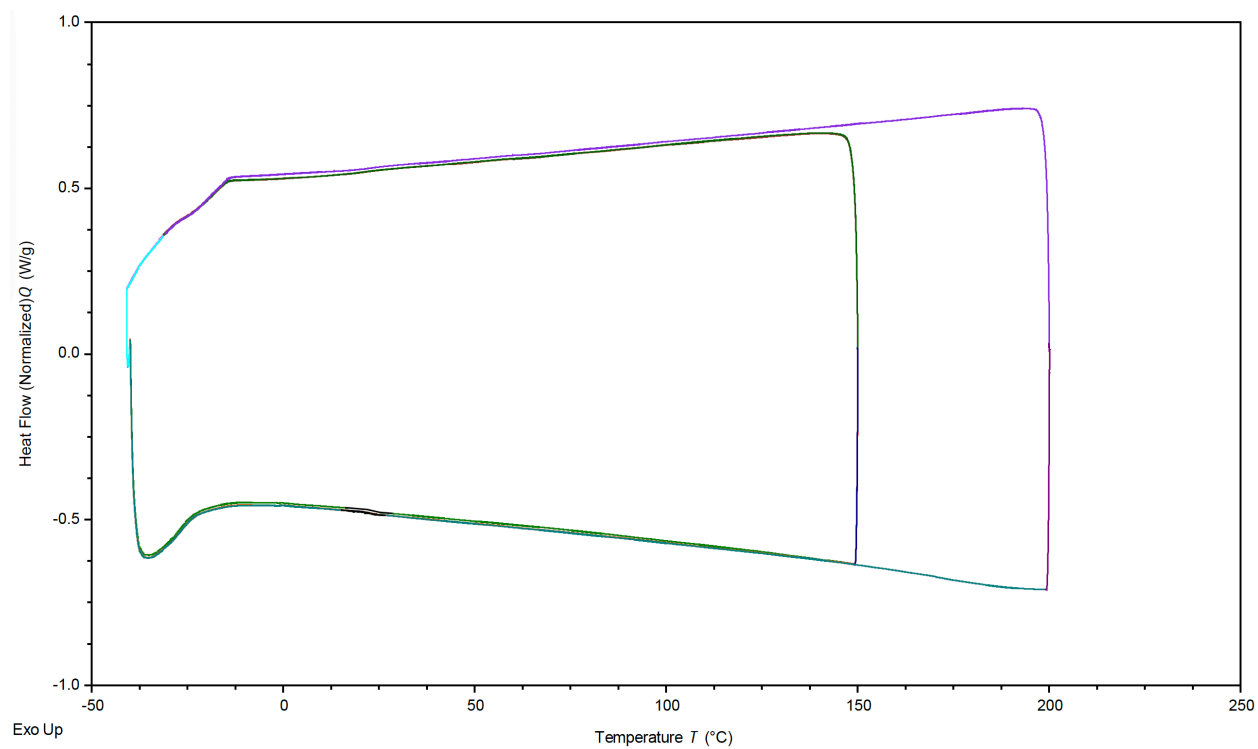

**Figure S20:** Thermal properties of the [Ni(HIm)<sub>6</sub>][NTf<sub>2</sub>]<sub>2</sub> MIL measured as a function of temperature using DSC.

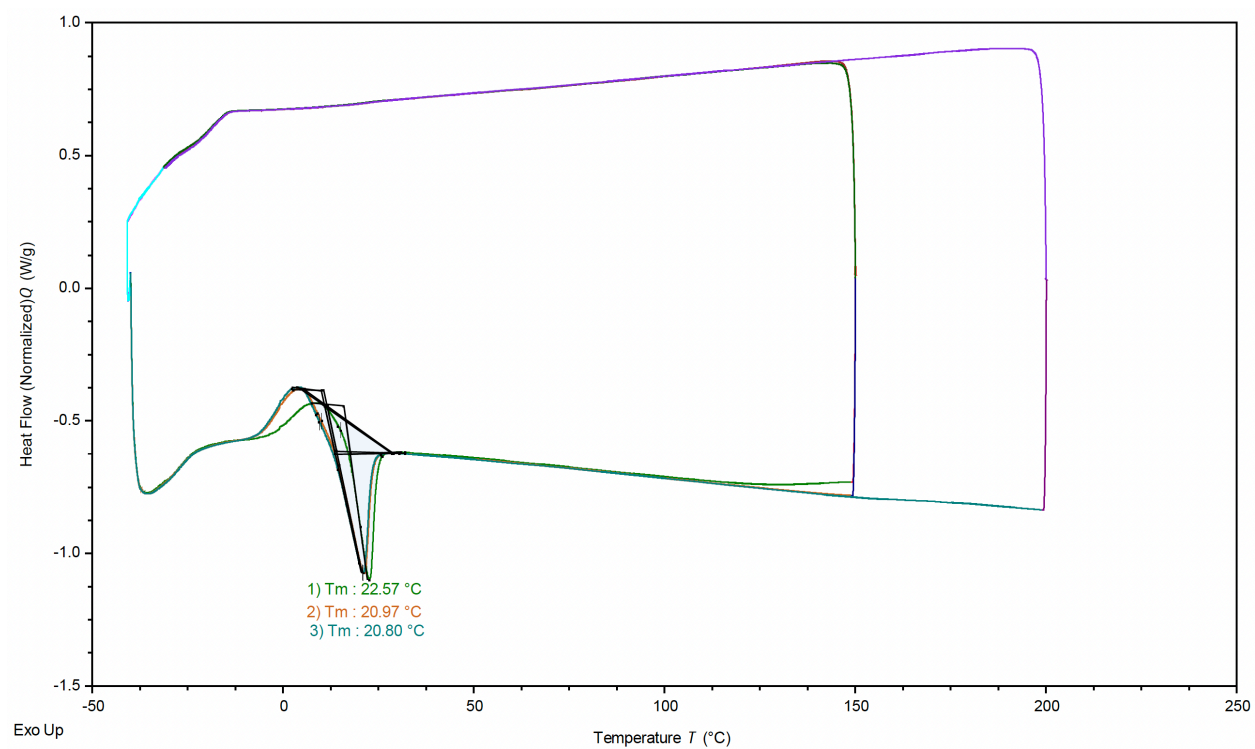

**Figure S21:** Thermal properties of the [Co(OIm)<sub>6</sub>][NTf<sub>2</sub>]<sub>2</sub> MIL measured as a function of temperature using DSC.

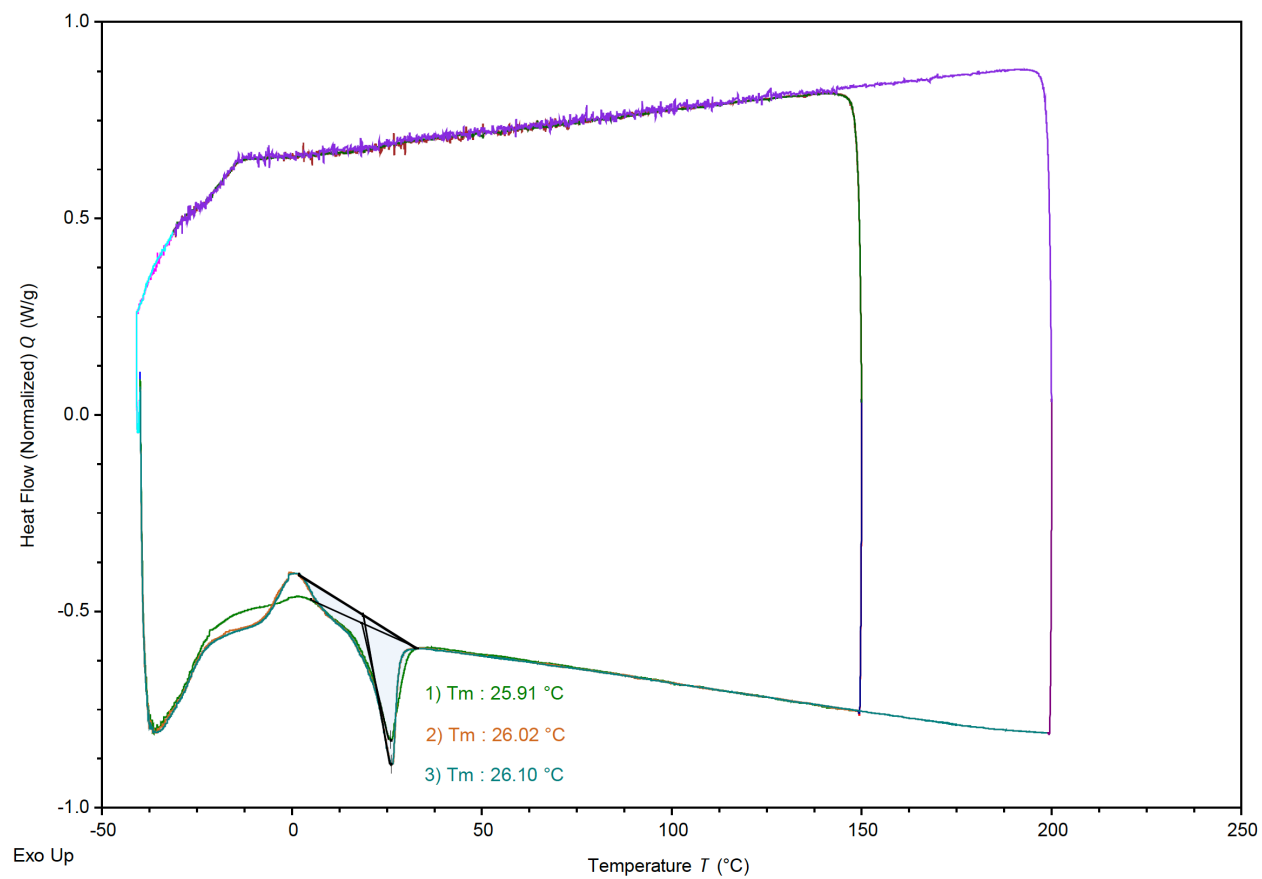

**Figure S22:** Thermal properties of the [Ni(OIm)<sub>6</sub>][NTf<sub>2</sub>]<sub>2</sub> MIL measured as a function of temperature using DSC.

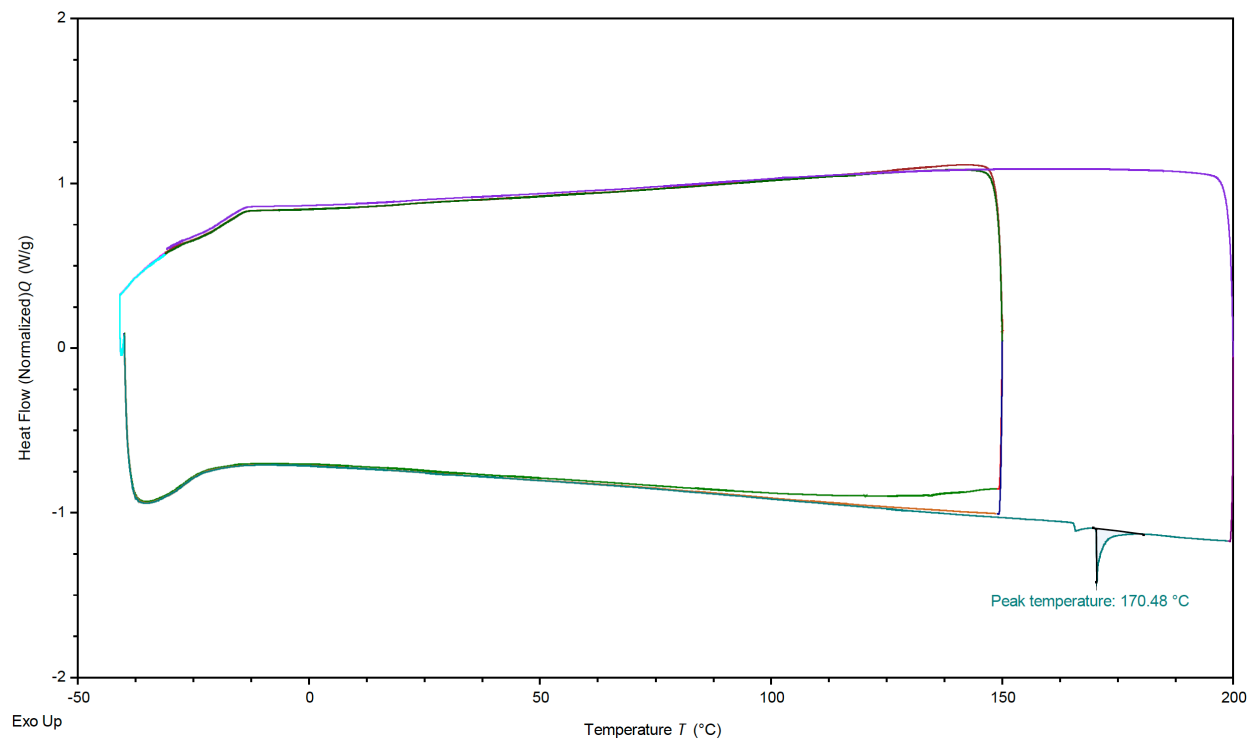

**Figure S23:** Thermal properties of the [Co(AmIm)<sub>6</sub>][NTf<sub>2</sub>]<sub>2</sub> MIL measured as a function of temperature using DSC.

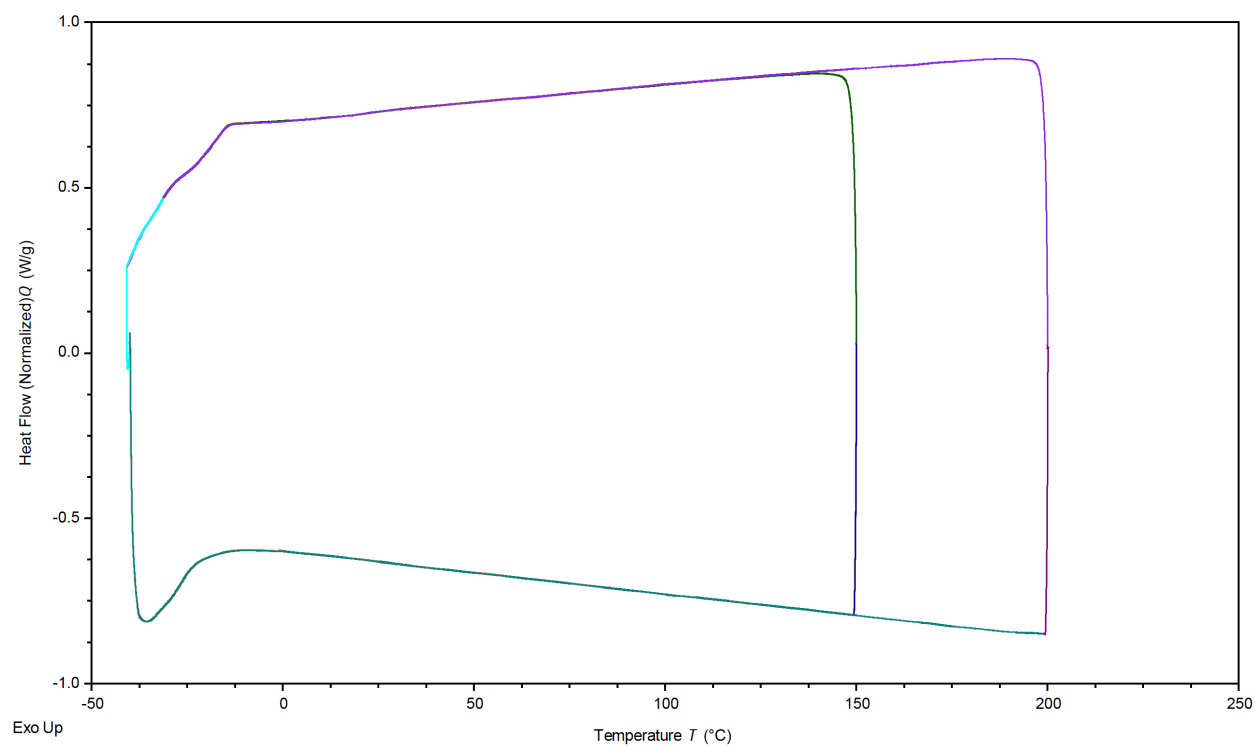

**Figure S24:** Thermal properties of the [Ni(AmIm)<sub>6</sub>][NTf<sub>2</sub>]<sub>2</sub> MIL measured as a function of temperature using DSC.

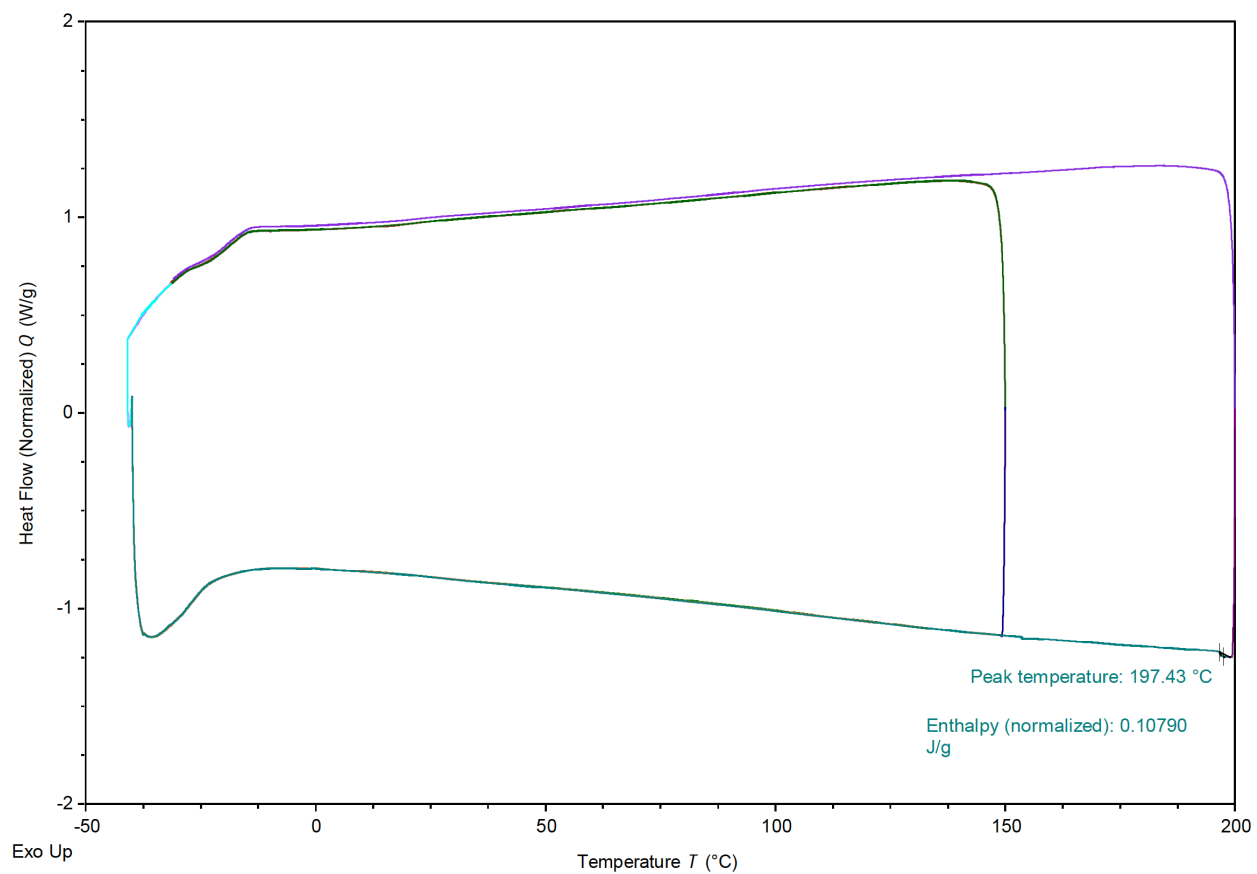

**Figure S25:** Thermal properties of the  $[\text{Co}(\text{N},\text{N}\text{-DMAc})_6][\text{NTf}_2]_2$  MIL measured as a function of temperature using DSC.

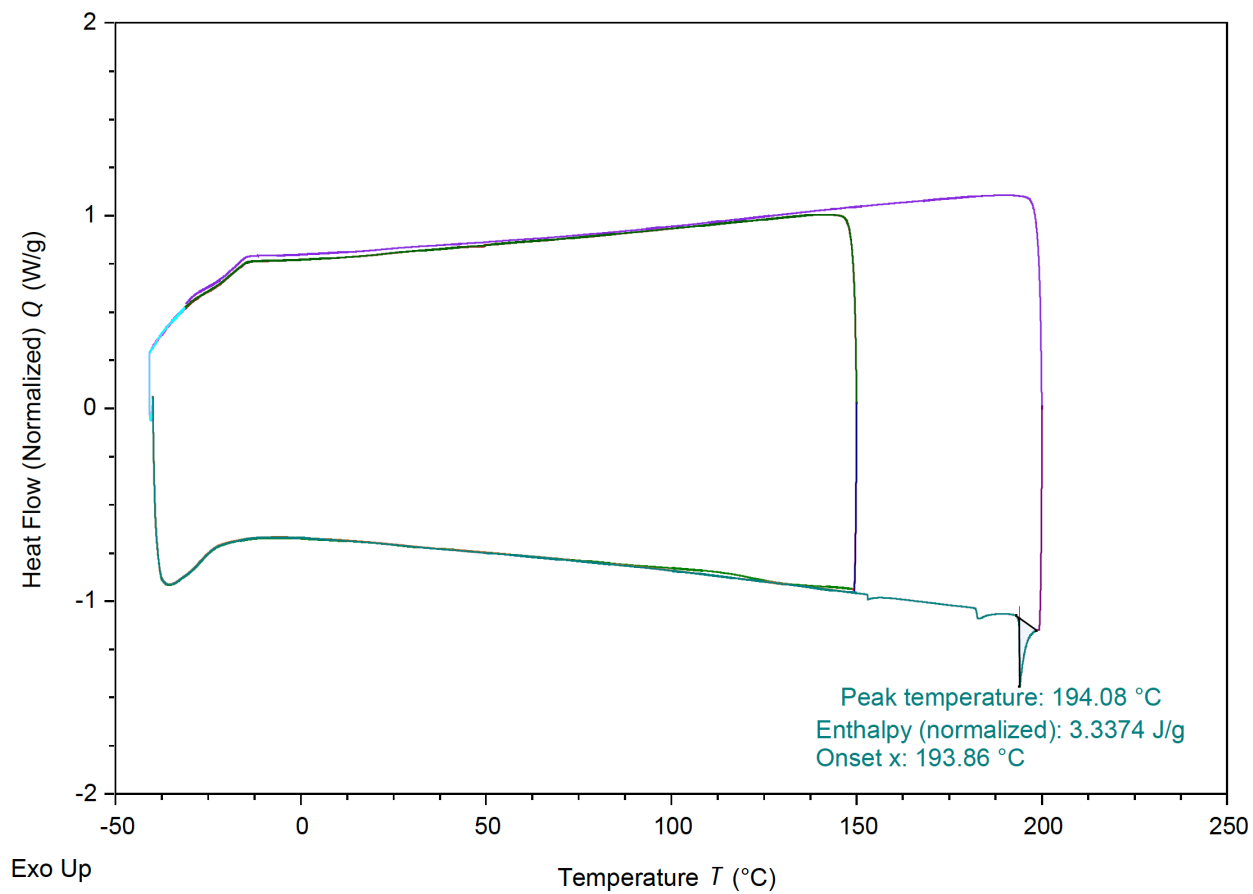

**Figure S26:** Thermal properties of the [Ni(*N,N*-DMAc)<sub>6</sub>][NTf<sub>2</sub>]<sub>2</sub> MIL measured as a function of temperature using DSC.



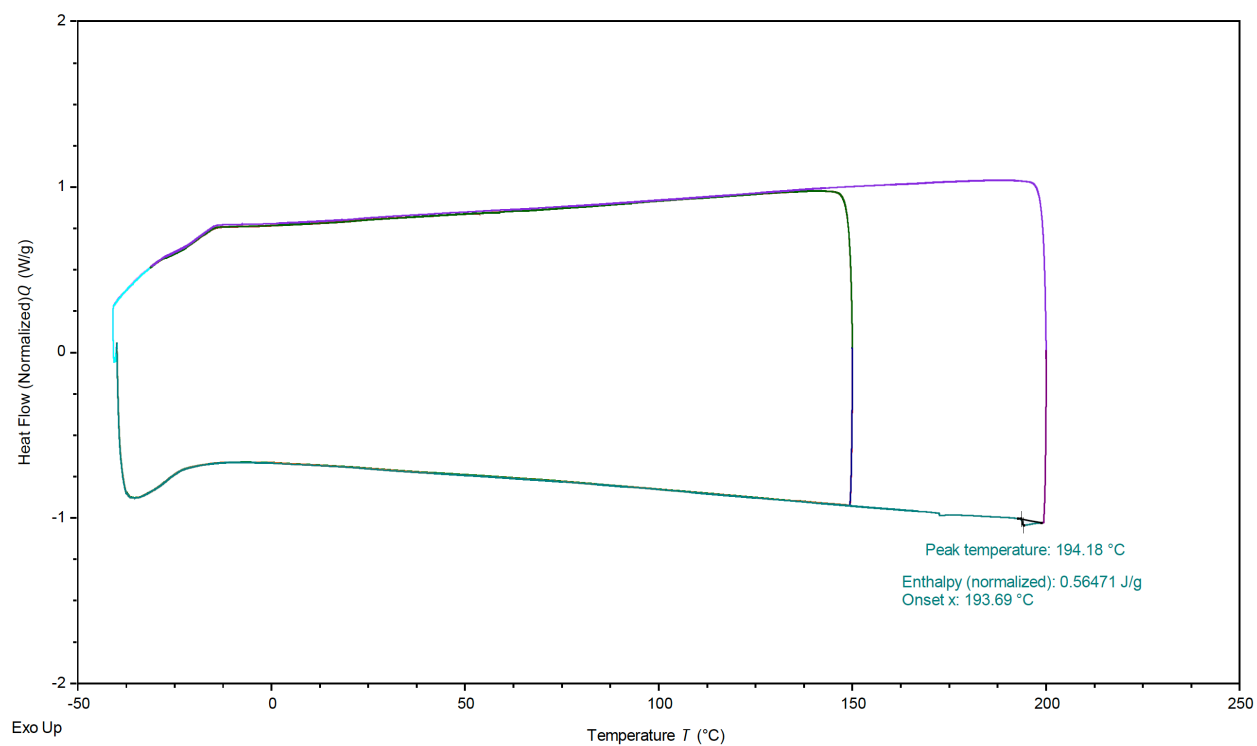

**Figure S27:** Thermal properties of the [Co(*N,N*-DMP)<sub>6</sub>][NTf<sub>2</sub>]<sub>2</sub> MIL measured as a function of temperature using DSC.

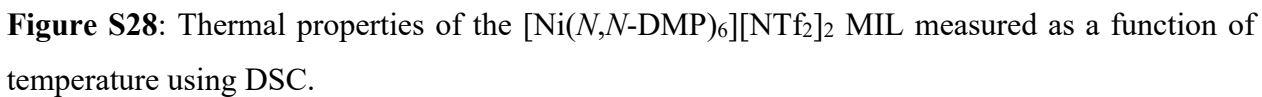

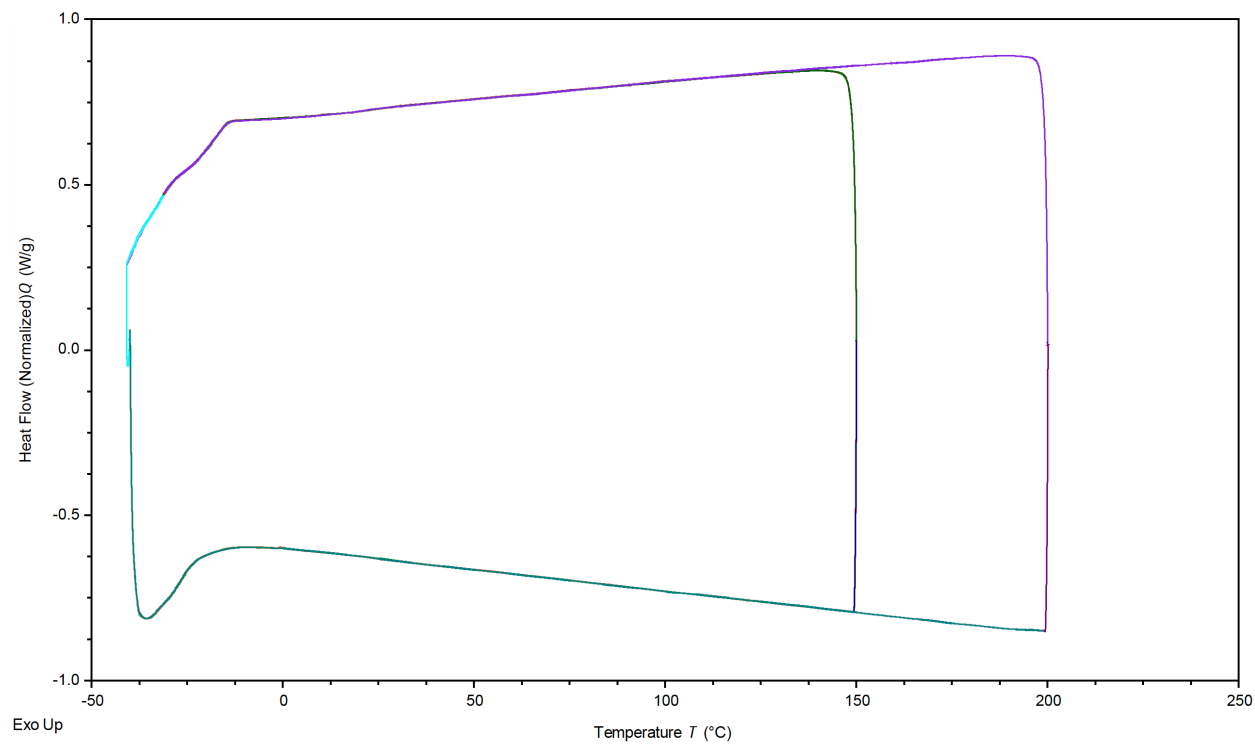

**Figure S29:** Thermal properties of the  $[\text{Co}(\text{TODGA})_2][\text{NTf}_2]_2$  MIL measured as a function of temperature using DSC.

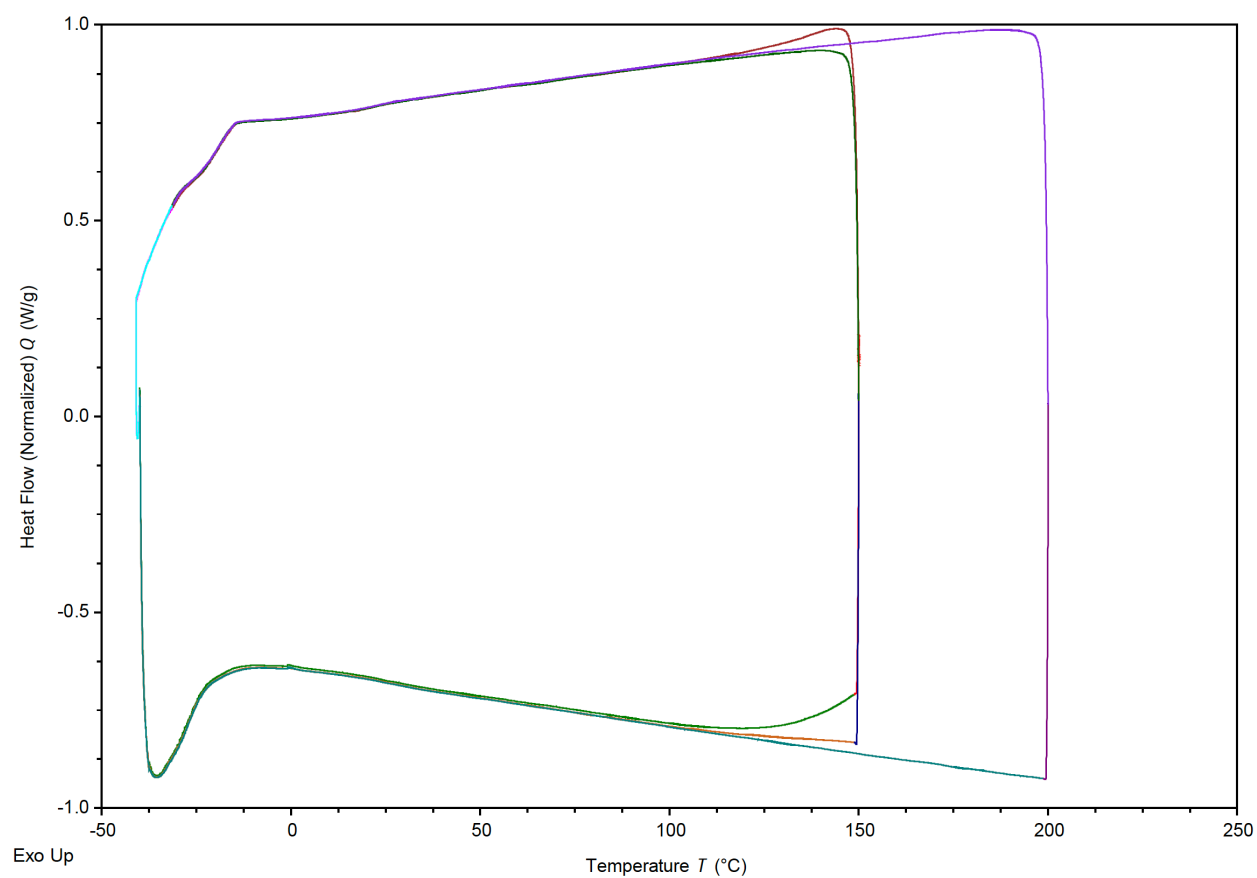

**Figure S30:** Thermal properties of the [Co(TODGA)<sub>2</sub>][NTf<sub>2</sub>]<sub>2</sub> MIL measured as a function of temperature using DSC.

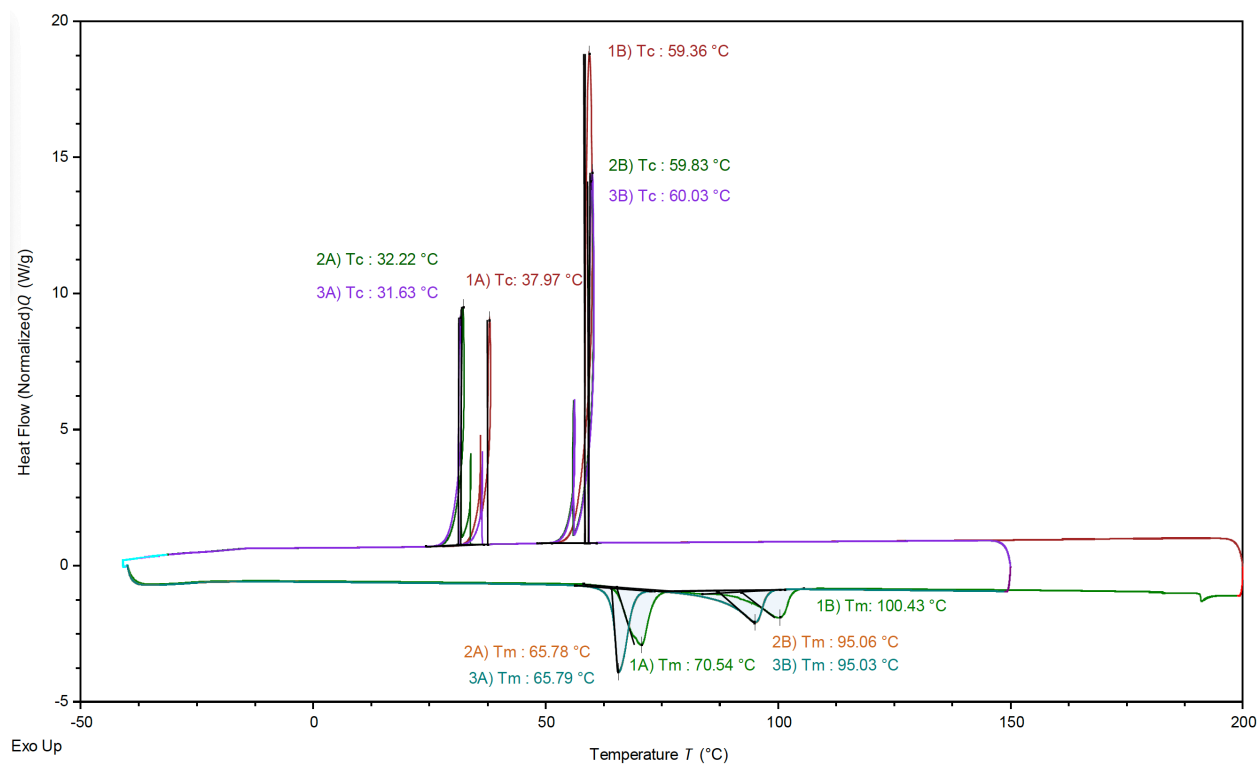

**Figure S31:** Thermal properties of the [Co(H<sub>2</sub>O)<sub>6</sub>][NTf<sub>2</sub>]<sub>2</sub> salt measured as a function of temperature using DSC.

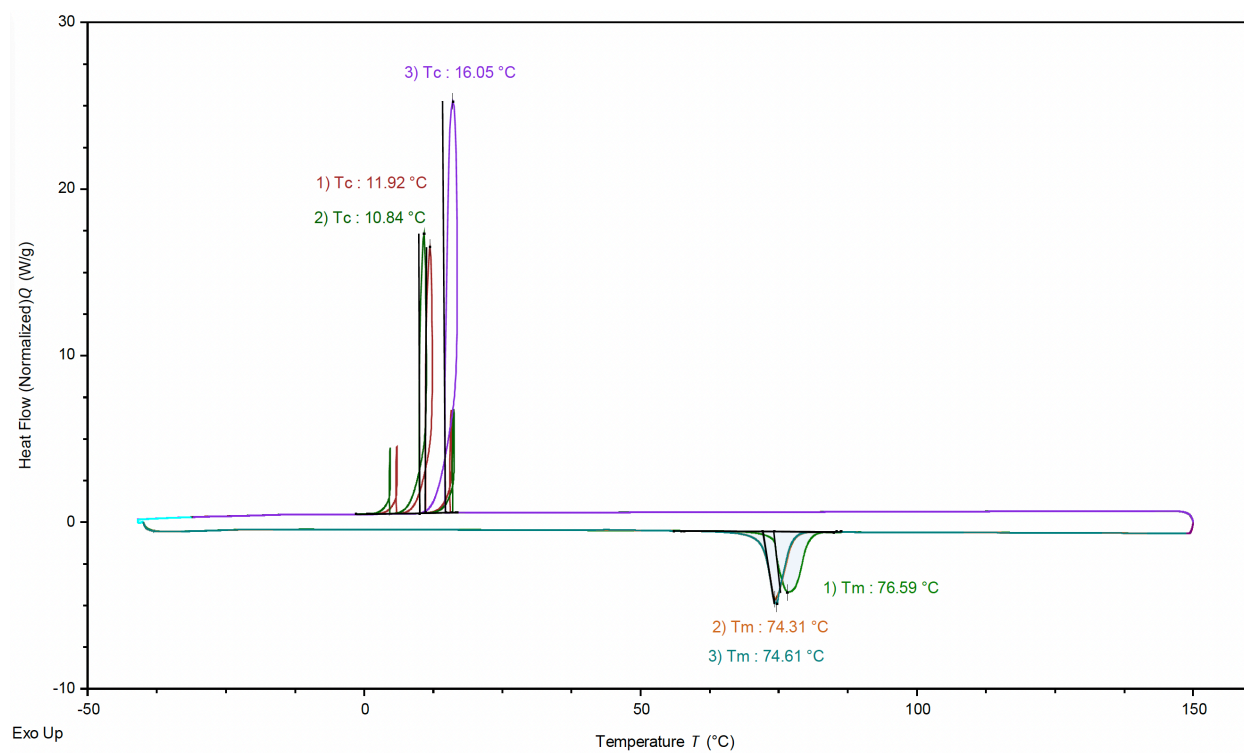

**Figure S32:** Thermal properties of the [Ni(H<sub>2</sub>O)<sub>6</sub>][NTf<sub>2</sub>]<sub>2</sub> salt measured as a function of temperature using DSC.

**$^1\text{H}$  NMR of  $N,N,N',N'$ -tetraoctyl diglycolamide (TODGA)**

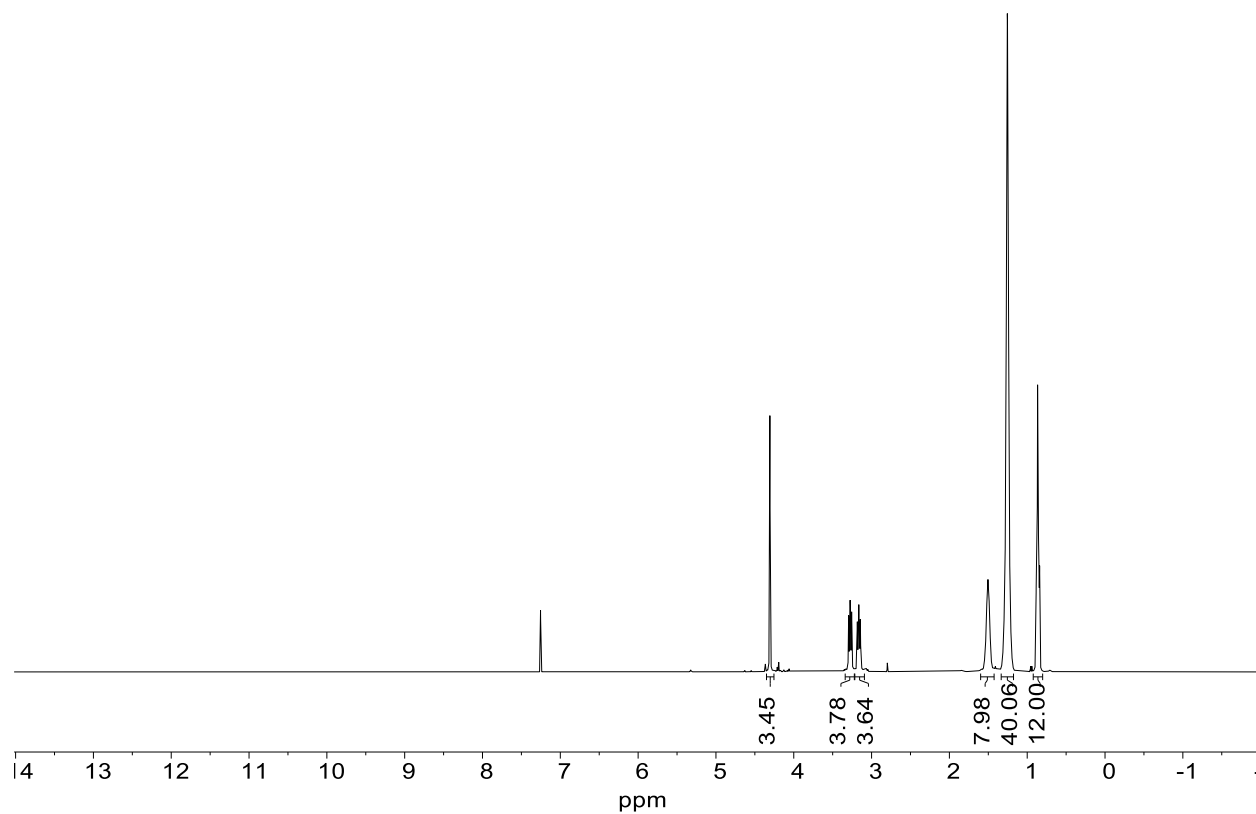

$^1\text{H}$  NMR (400 MHz,  $\text{CDCl}_3$ )  $\delta$  4.31 (s, 3H), 3.34 – 3.22 (m, 4H), 3.22 – 3.09 (m, 4H), 1.60 – 1.43 (m, 8H), 1.33 – 1.18 (m, 40H), 0.86 (td,  $J$  = 6.8, 3.3 Hz, 12H).

**$^{13}\text{C}$  NMR of *N,N,N',N'*-tetraoctyl diglycolamide (TODGA)**

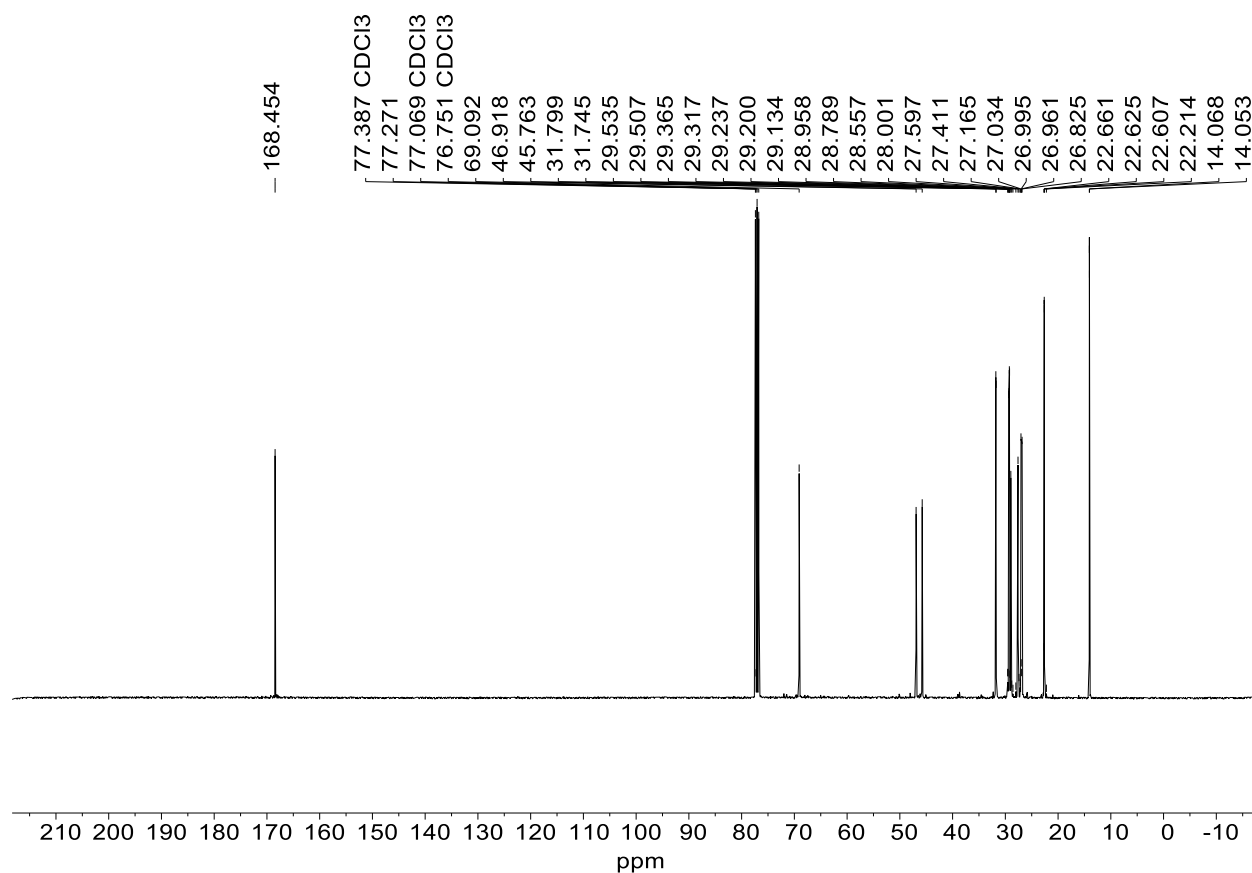

$^{13}\text{C}$  NMR (101 MHz,  $\text{CDCl}_3$ )  $\delta$  168.45, 77.27, 69.09, 46.92, 45.76, 31.80, 31.75, 29.51, 29.36, 29.32, 29.24, 29.20, 28.96, 28.79, 27.60, 27.41, 27.16, 27.03, 26.99, 26.96, 26.82, 22.66, 22.63, 22.61, 14.07, 14.05.



## References

- (1) Nacham, O.; Clark, K. D.; Yu, H.; Anderson, J. L. Synthetic Strategies for Tailoring the Physicochemical and Magnetic Properties of Hydrophobic Magnetic Ionic Liquids. *Chem. Mater.* **2015**, 27 (3), 923–931. <https://doi.org/10.1021/cm504202v>.
